# Supplementary material
Source: publisher figshare collection journal article supplement (https://acs.figshare.com/ndownloader/files/4756987)

# Supporting Information

## A Study of the Scope and Regioselectivity of the Ruthenium-Catalyzed [3+2]-Cycloaddition of Azides with Internal Alkynes

Max M. Majireck and Steven M. Weinreb\*

*Department of Chemistry, The Pennsylvania State University  
University Park, Pennsylvania 16802*

*smw@chem.psu.edu*

### **Table of Contents**

|                                      |        |
|--------------------------------------|--------|
| Title page                           | S1     |
| NMR spectra of compounds <b>1-16</b> | S2-S43 |

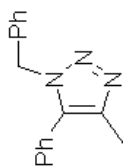

1a

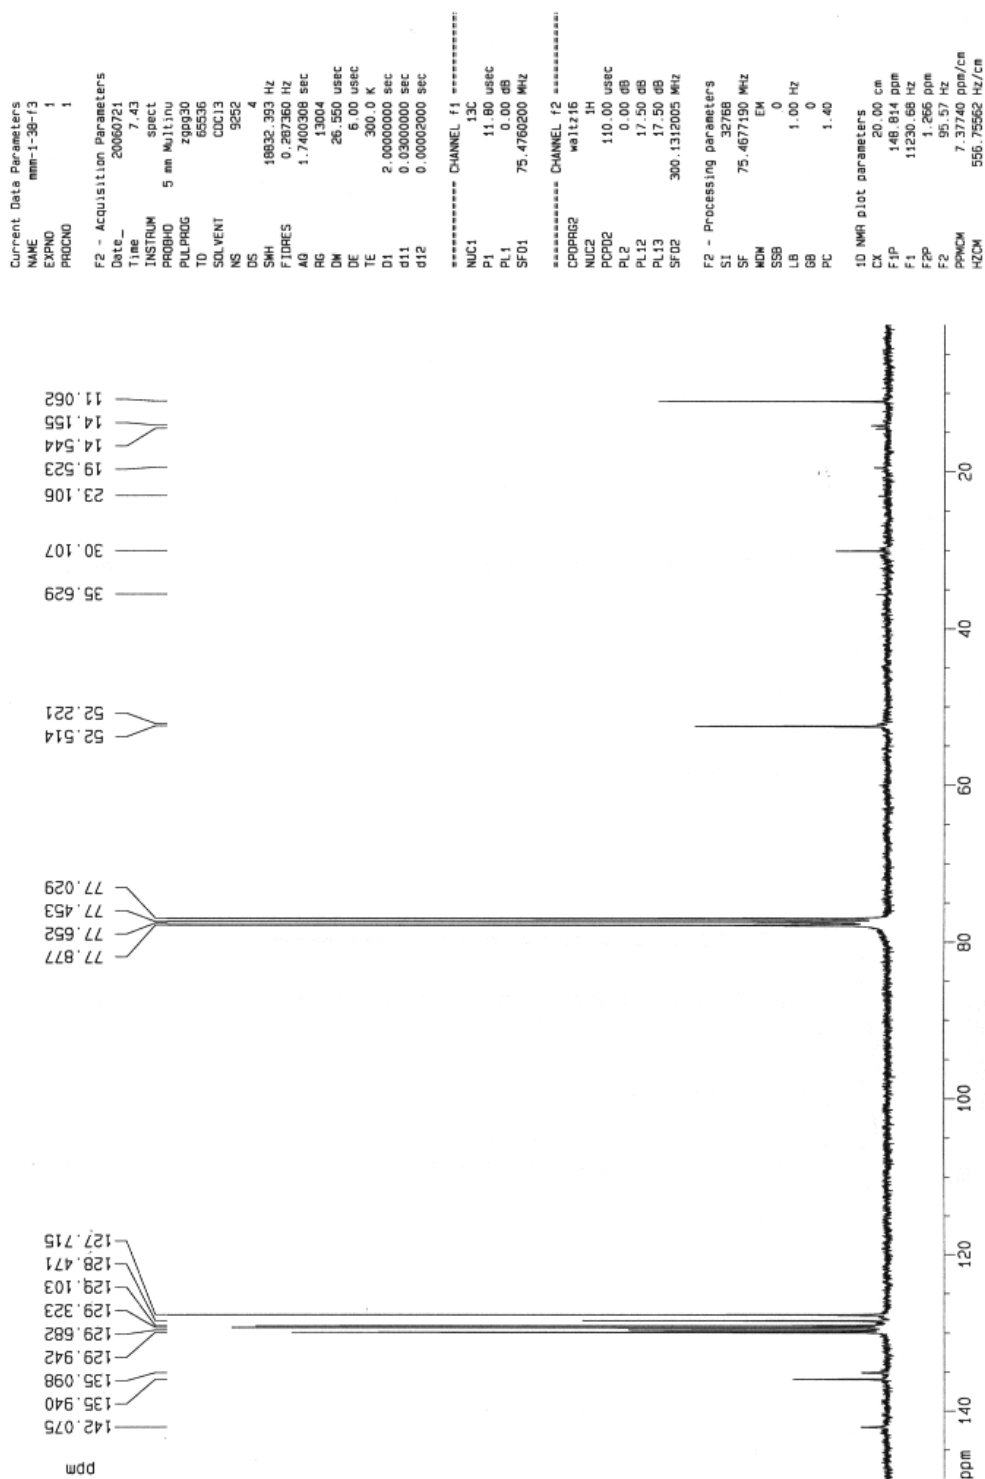

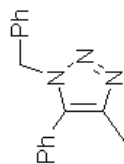

1a

Current Data Parameters  
NAME 80t9-mm-1-3g  
EXPNO 7  
PROCNO 1

F2 - Acquisition Parameters

Date\_ 20060408  
Time 10.55  
INSTRUM spect  
PROBHD 5 mm QNP 1H/1  
PULPROG zg30  
TD 24690  
SOLVENT CDCl3  
NS 16  
DS 2  
SWH 6172.839 Hz  
FIDRES 0.250014 Hz  
AQ 1.9999400 sec  
RG 228.1  
DM 81.000 usec  
DE 6.00 usec  
TE 300.0 K  
D1 1.00000000 sec

===== CHANNEL f1 =====

NUC1 1H  
P1 11.70 usec  
PL1 0.00 dB  
SFO1 299.8718518 MHz

F2 - Processing parameters

SI 32768  
SF 299.8700000 MHz  
WDW no  
SSB 0  
LB 0.00 Hz  
GB 0  
PC 1.00

10 NMR plot parameters

CX 20.00 cm  
FJP 7.703 ppm  
F1 2310.04 Hz  
F2 0.612 ppm  
F2 183.50 Hz  
PPMCM 0.35458 ppm/cm  
HZCM 106.32729 Hz/cm

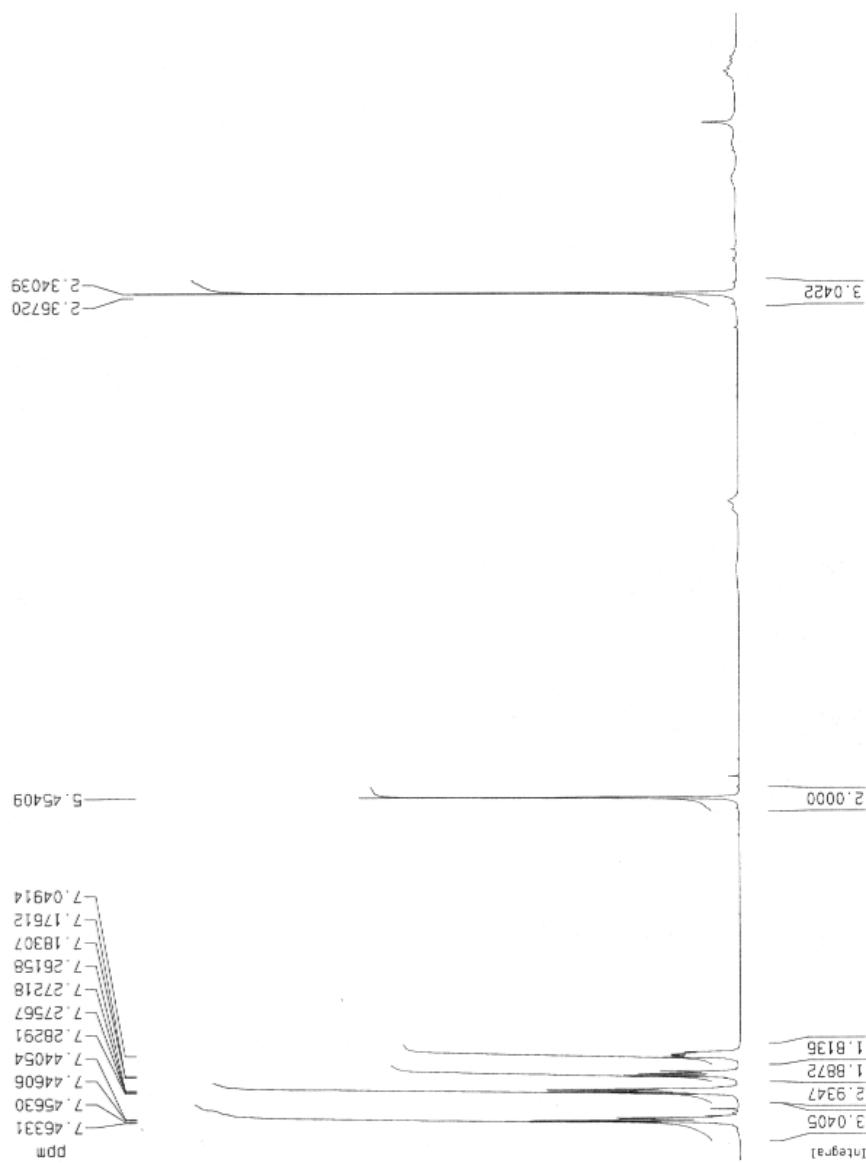

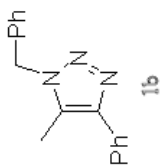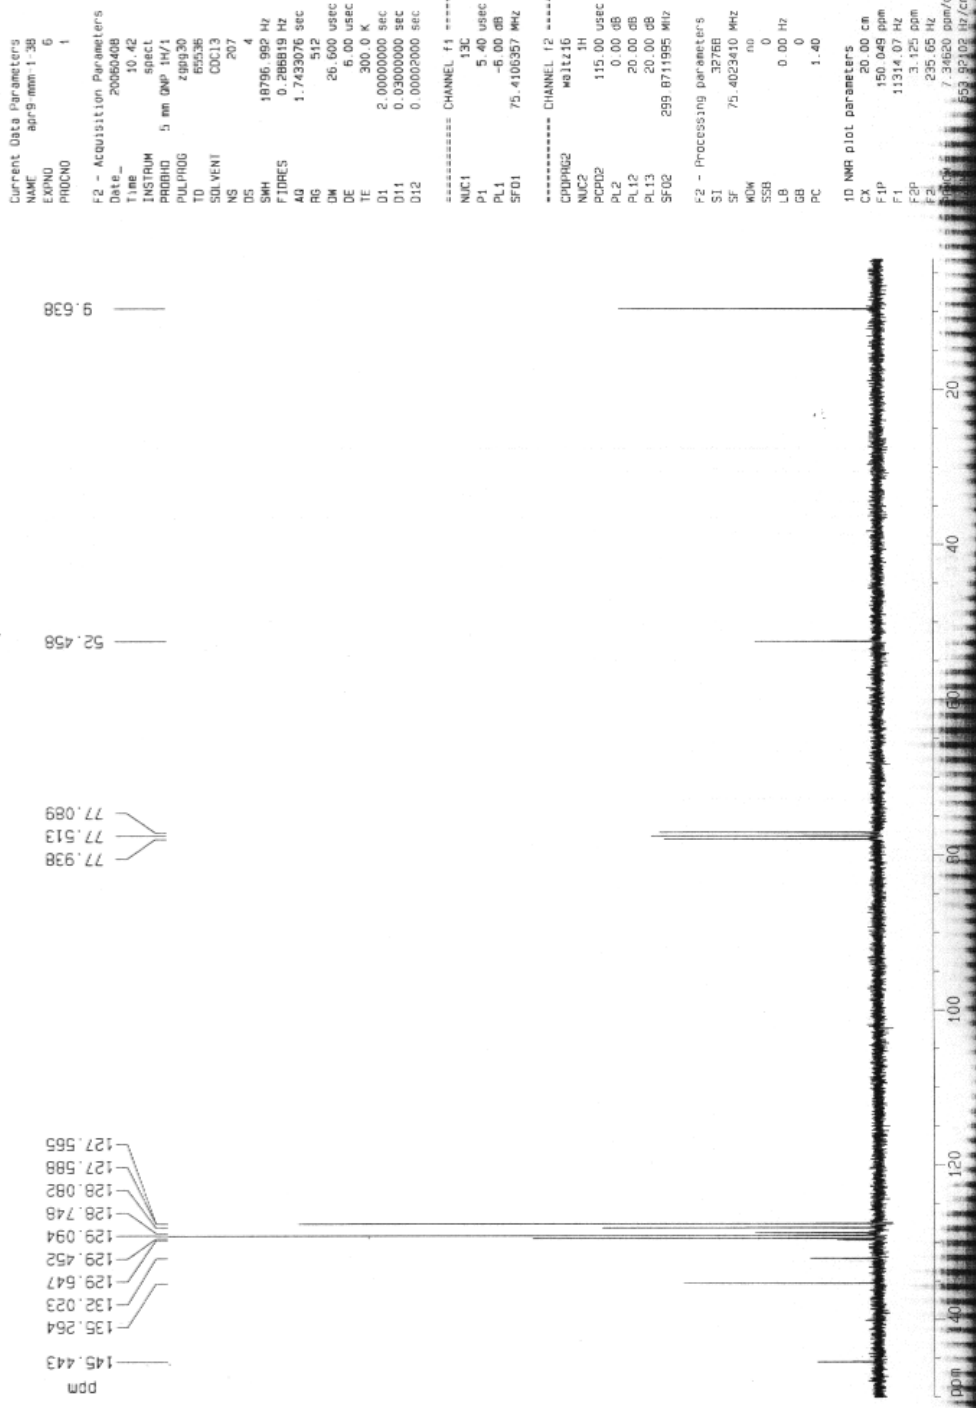

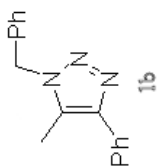

Current Data Parameters  
 NAME apr-9-mm-1-3g  
 EXPNO 5  
 PROCNO 1

F2 - Acquisition Parameters

Date\_ 20060408  
 Time 10.28  
 INSTRUM spect  
 PROBHD 5 mm QNP 1H/1  
 PULPROG zg30  
 TO 24690  
 SOLVENT CDCl3  
 NS 16  
 DS 2  
 SWH 6172.839 Hz  
 FIDRES 0.250014 Hz  
 AQ 1.9999400 sec  
 RG 161.3  
 DW 81.000 usec  
 DE 6.00 usec  
 TE 300.0 K  
 D1 1.0000000 sec

\*\*\*\*\* CHANNEL f1 \*\*\*\*\*  
 NUC1 1H  
 P1 11.70 usec  
 PL1 0.00 dB  
 SF01 299.8718518 MHz

F2 - Processing parameters

SI 32768  
 SF 299.8700000 MHz  
 MDW no  
 SSB 0  
 LB 0.00 Hz  
 GB 0  
 PC 1.00

1D NMR plot parameters

CX 20.00 cm  
 F1p 8.040 ppm  
 F1 2410.96 Hz  
 F2p 0.706 ppm  
 F2 211.70 Hz  
 PPMCM 0.36670 ppm/cm  
 HZCM 109.96301 Hz/cm

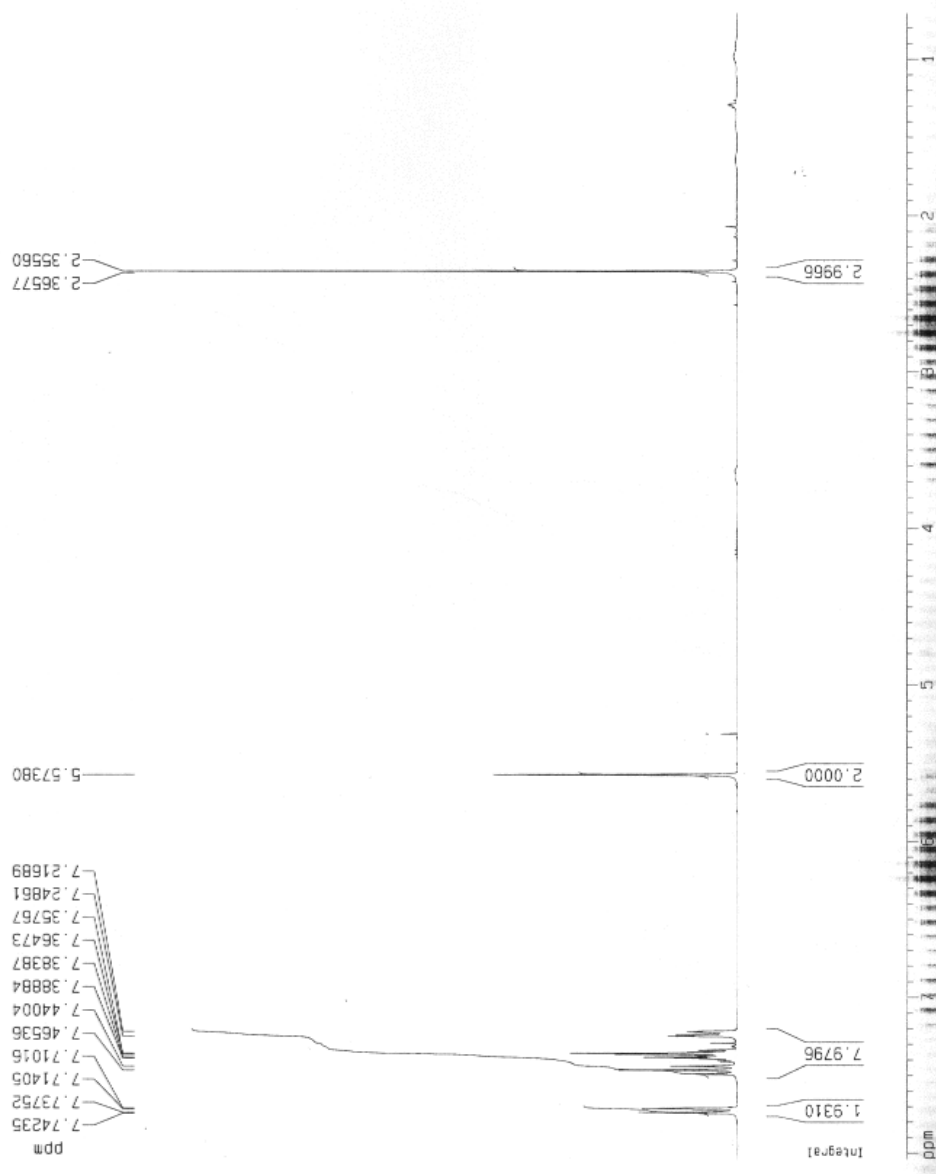

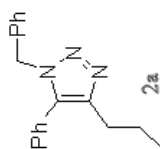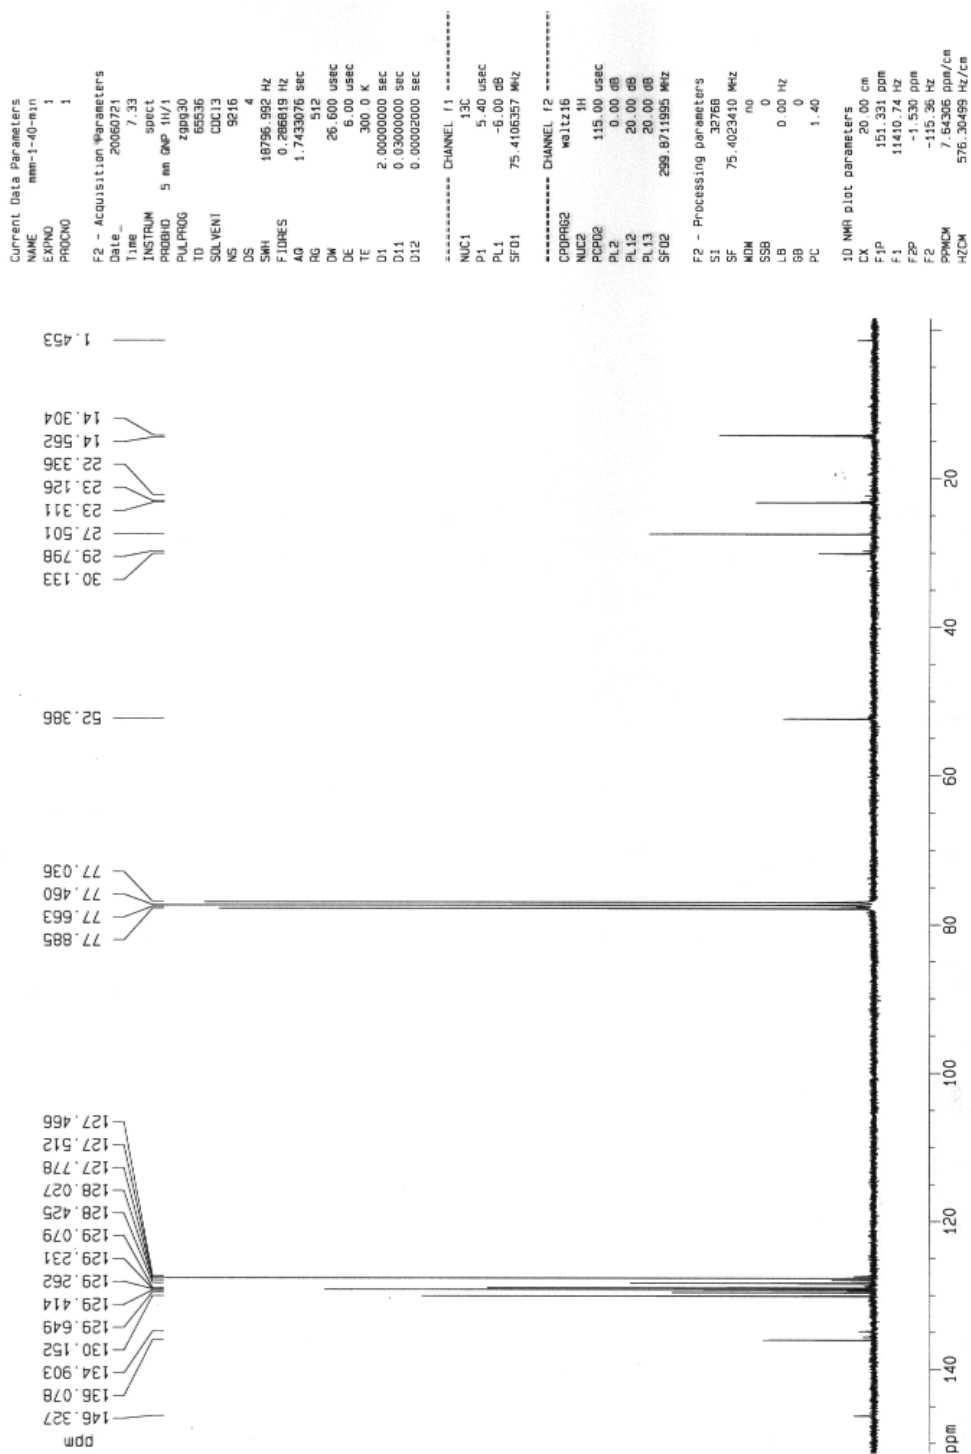

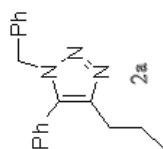

Current Data Parameters  
 NAME mm-j-40  
 EXPNO 1  
 PROCNO 1

F2 - Acquisition Parameters  
 Date\_ 20060905  
 Time 19.46  
 INSTRUM spect  
 PROBHD 5 mm Multinu  
 PULPROG zg30  
 TO 65536  
 SOLVENT CDCl3  
 NS 8  
 DS 2  
 SWH 6172.839 Hz  
 FIDRES 0.094190 Hz  
 AQ 5.3084660 sec  
 RG 406.4  
 DM 81.000 usec  
 DE 6.00 usec  
 TE 300.0 K  
 D1 1.00000000 sec

===== CHANNEL f1 =====  
 NUC1 1H  
 P1 9.60 usec  
 PL1 -6.00 dB  
 SF01 300.1318534 MHz

F2 - Processing parameters  
 SI 32768  
 SF 300.1300000 MHz  
 WDW no  
 SSB 0  
 LB 0.00 Hz  
 GB 0  
 PC 1.00

10 NMR plot parameters  
 CX 20.00 cm  
 F1P 8.383 ppm  
 F1 2515.94 Hz  
 F2P 0.307 ppm  
 F2 92.13 Hz  
 PPMCM 0.40379 ppm/cm  
 HZCM 121.19061 Hz/cm

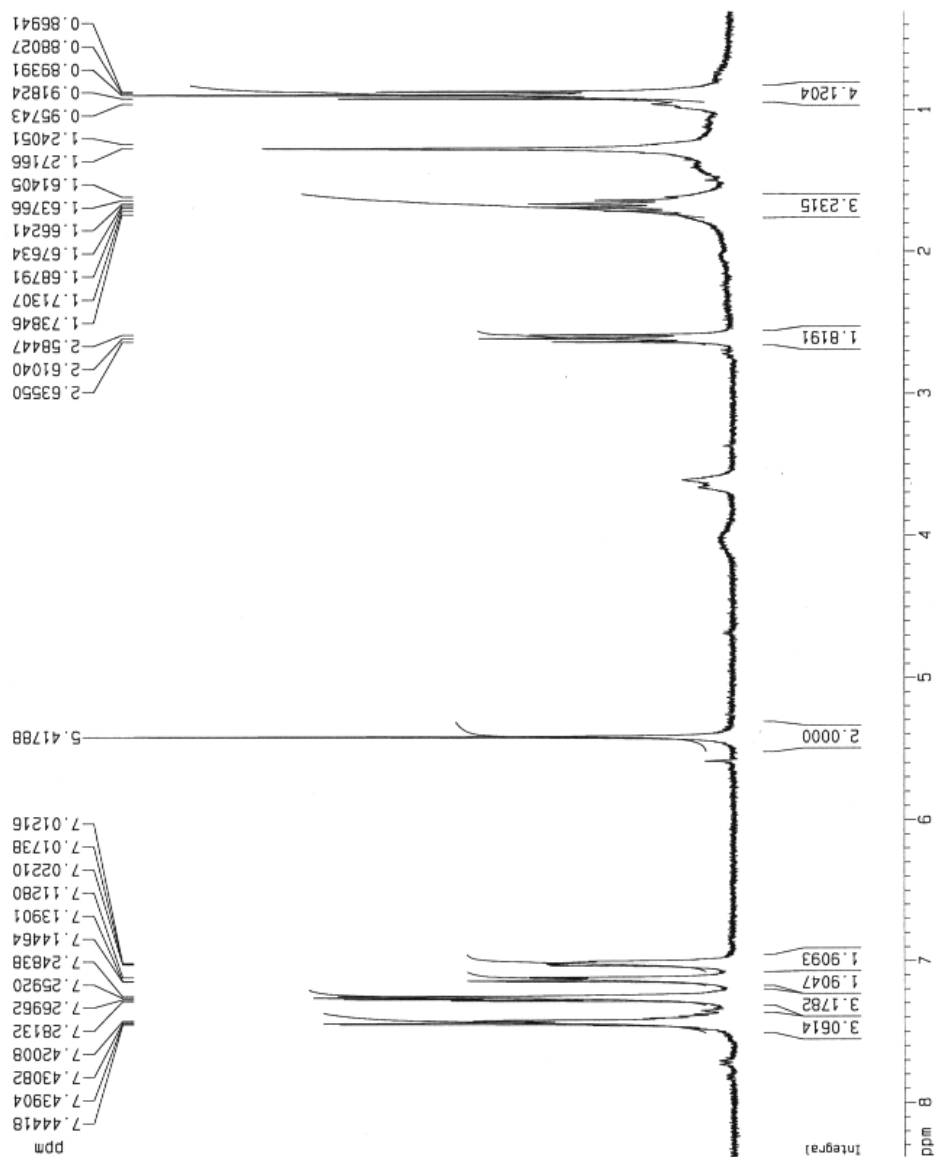





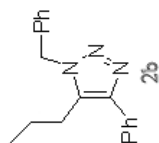

Current Data Parameters  
 NAME mmn-1-40  
 EXPNO 1  
 PROCNO 1

F2 - Acquisition Parameters  
 Date\_ 20060529  
 Time 18.14  
 INSTRUM spect  
 PROBHD 5 mm BBI 1H-8  
 PULPROG zg  
 TD 65536  
 SOLVENT CDCl3  
 NS 1  
 DS 0  
 SWH 4401.409 Hz  
 FIDRES 0.067160 Hz  
 AQ 7.4449396 sec  
 RG 64  
 DM 113.600 usec  
 DE 6.00 usec  
 TE 300.0 K  
 D1 1.00000000 sec

===== CHANNEL f1 =====  
 NUC1 1H  
 P1 7.21 usec  
 PL1 0.00 dB  
 SF01 400.1318049 MHz

F2 - Processing parameters  
 SI 32768  
 SF 400.1300000 MHz  
 MDW no  
 SSB 0  
 LB 0.00 Hz  
 GB 0  
 PC 1.00

1D NMR plot parameters  
 CX 20.00 cm  
 F1P 7.931 ppm  
 F1 3173.25 Hz  
 F2P 0.442 ppm  
 F2 176.96 Hz  
 PPMCM 0.37441 ppm/cm  
 HZCM 149.81435 Hz/cm

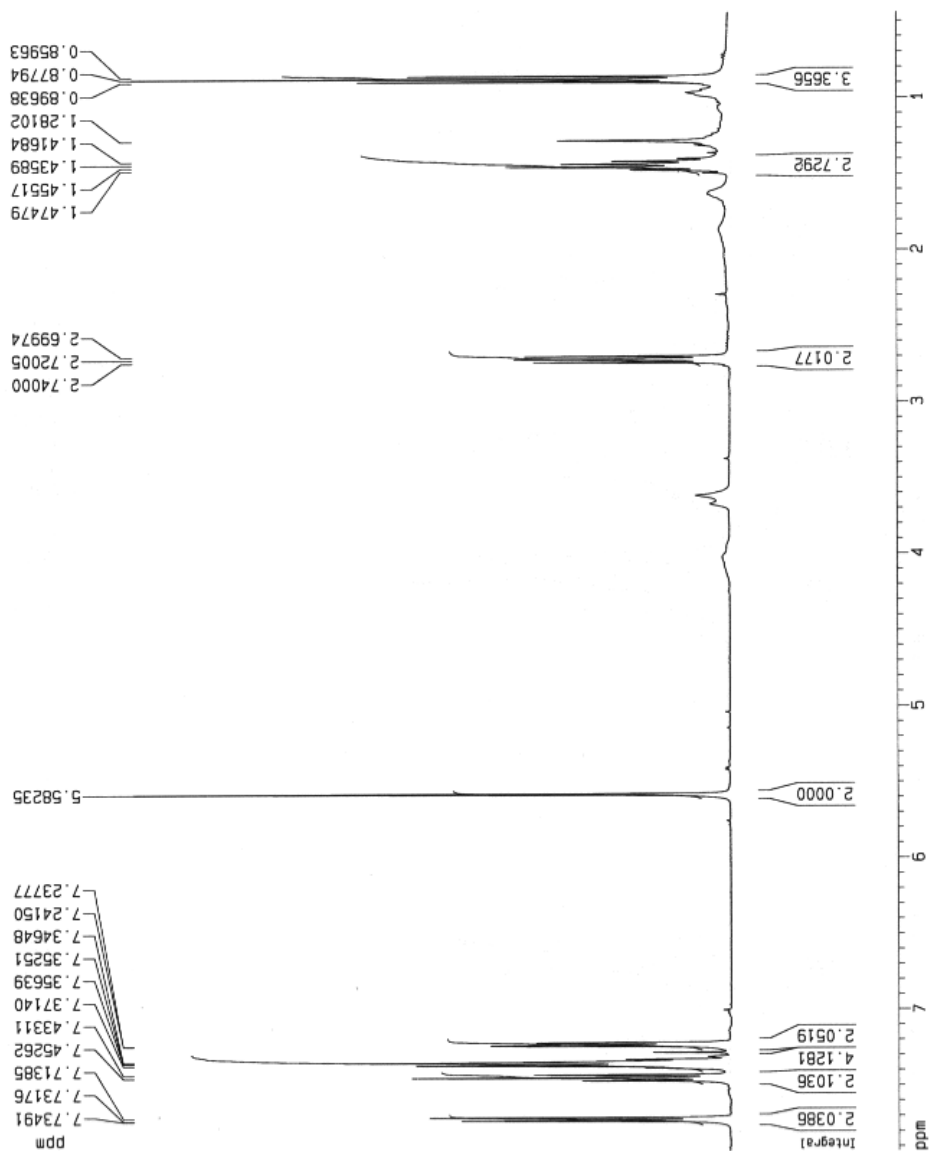

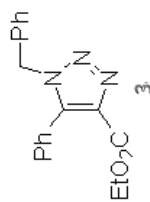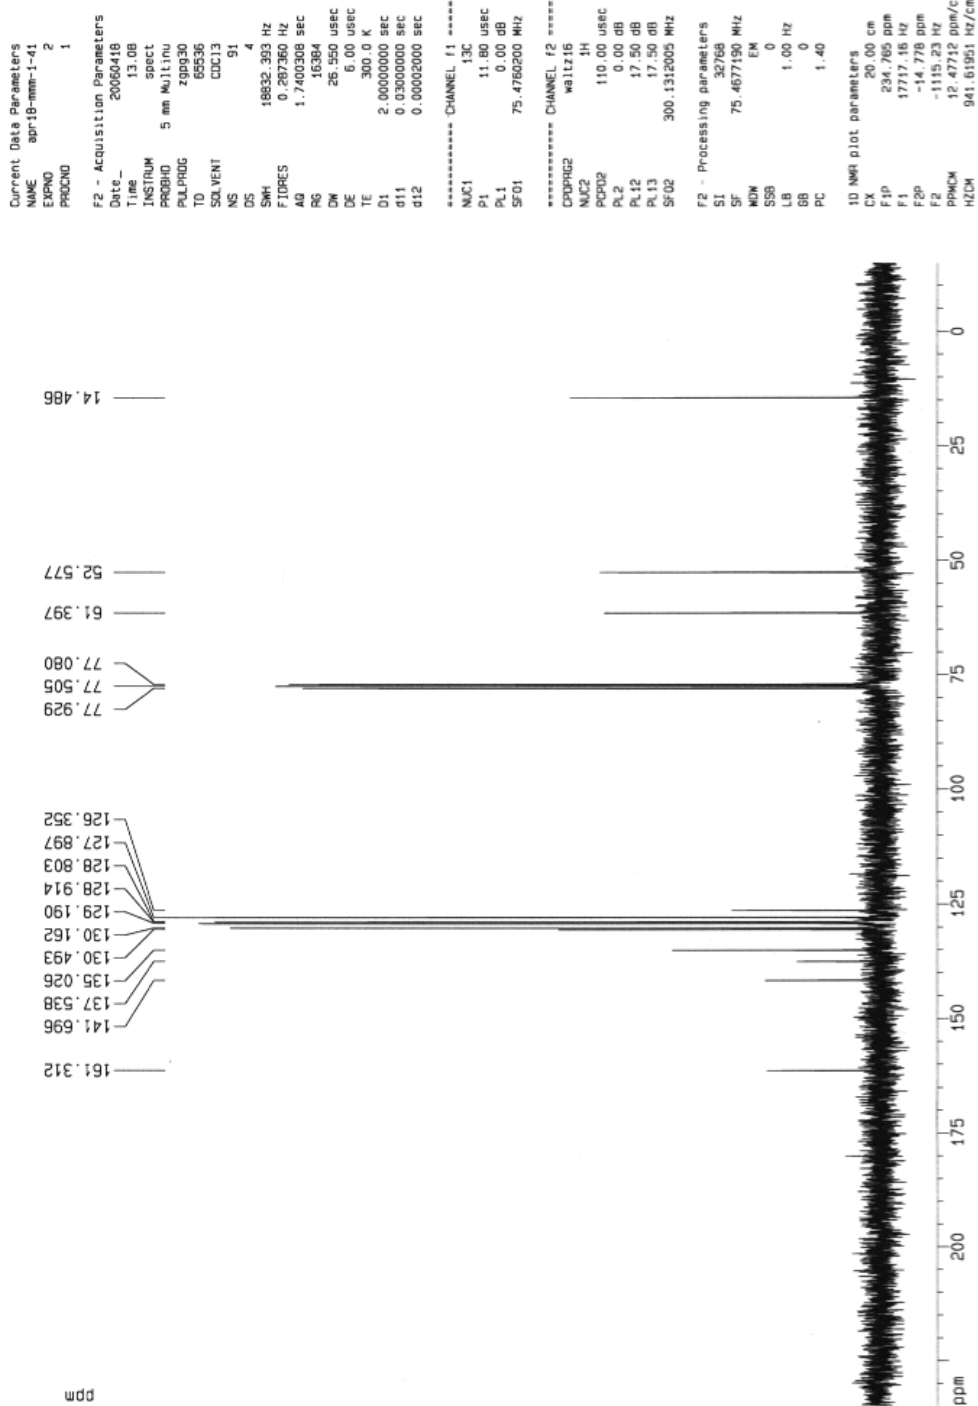

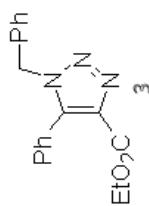

Current Data Parameters  
 NAME may1-unlabeled  
 EXPNO 1  
 PROCNO 1  
 F2 - Acquisition Parameters  
 Date\_ 20060501  
 Time 9.14  
 INSTRUM spect  
 PROBHD 5 mm BBI 1H-8  
 PULPROG zg30  
 TD 33110  
 SOLVENT CDCl3  
 NS 16  
 DS 2  
 SWH 8278.146 Hz  
 FIDRES 0.250019 Hz  
 AQ 1.9998940 sec  
 RG 64  
 DM 60.400 usec  
 DE 6.00 usec  
 TE 300.0 K  
 D1 1.00000000 sec  
 ===== CHANNEL f1 =====  
 NUC1 1H  
 P1 6.45 usec  
 PL1 0.00 dB  
 SF01 400.1324710 MHz  
 F2 - Processing parameters  
 SI 32768  
 SF 400.1300000 MHz  
 MDW no  
 SSB 0  
 LB 0.00 Hz  
 GB 0  
 PC 1.00  
 1D NMR plot parameters  
 CK 20.00 cm  
 F1P 7.983 ppm  
 F1 3194.15 Hz  
 F2P 0.343 ppm  
 F2 137.29 Hz  
 PPM0M 0.30198 ppm/cm  
 HZ0M 152.84308 Hz/cm

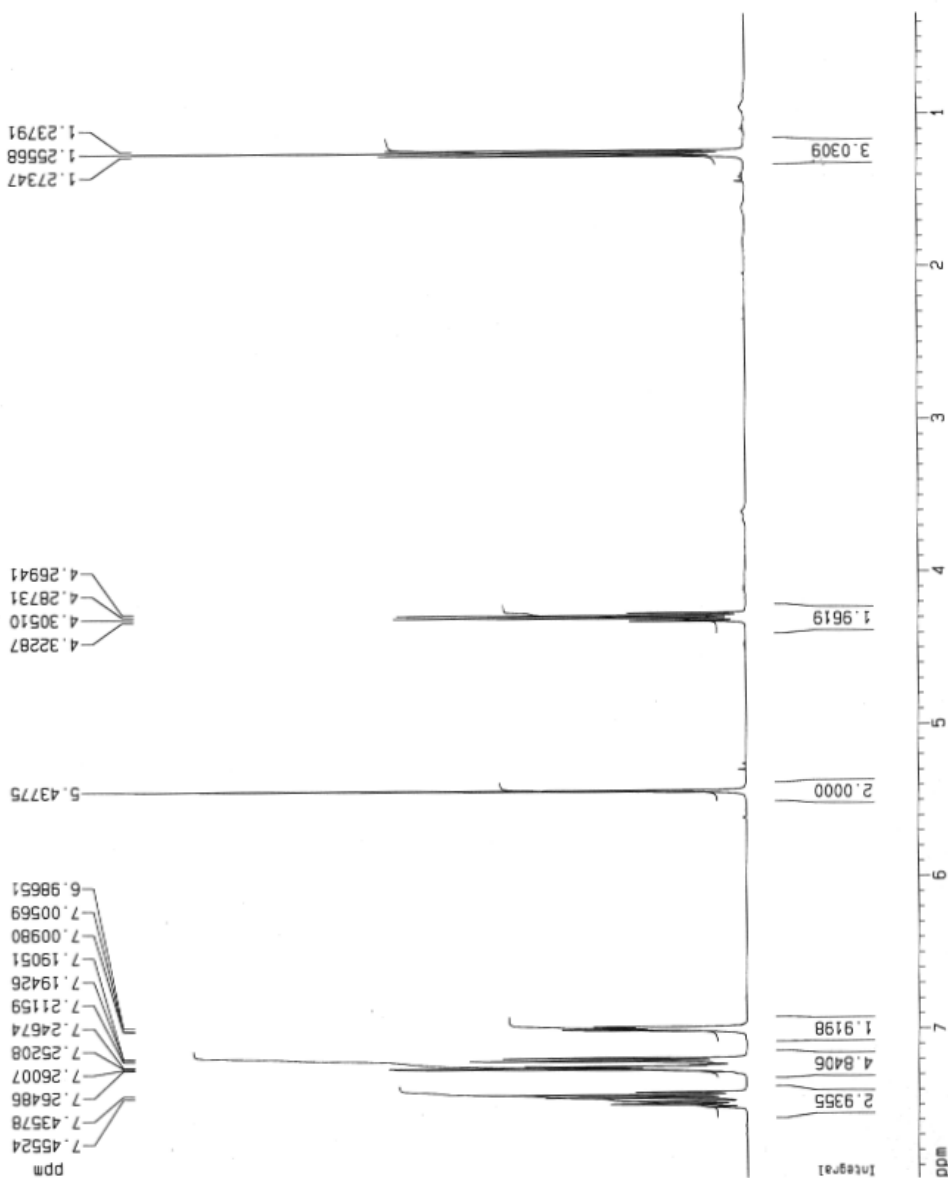

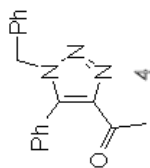

Current Data Parameters  
NAME aug5-mm-1-~~20~~  
EXPNO 1  
PROCNO 1

F2 - Acquisition Parameters  
Date\_ 20060805  
Time 15.07  
INSTRUM spect  
PROBHD 5 mm QNP 1H/1  
PULPROG zgpg30  
TD 65536  
SOLVENT CDCl3  
NS 101  
DS 4  
SWH 18796.992 Hz  
FIDRES 0.288819 Hz  
AQ 1.7433076 sec  
RG 1625.5  
DM 26.600 usec  
DE 6.00 usec  
TE 300.0 K  
D1 2.00000000 sec  
D11 0.03000000 sec  
D12 0.00002000 sec

===== CHANNEL f1 =====  
NUC1 13C  
P1 5.40 usec  
PL1 -6.00 dB  
SF01 75.4106357 MHz

===== CHANNEL f2 =====  
CPDPRG2 waltz16  
NUC2 1H  
PCPD2 115.00 usec  
PL2 0.00 dB  
PL12 20.00 dB  
PL13 20.00 dB  
SF02 299.8711995 MHz

F2 - Processing parameters  
SI 32768  
SF 75.4023410 MHz  
WDW EM  
SSB 0  
LB 1.00 Hz  
GB 0  
PC 1.40

1D NMR plot parameters  
CX 20.00 cm  
FIP 199.655 ppm  
F1 15054.46 Hz  
F2P 18.752 ppm  
F2 1413.95 Hz  
PPMCM 9.04515 ppm/cm  
HZCM 682.02515 Hz/cm

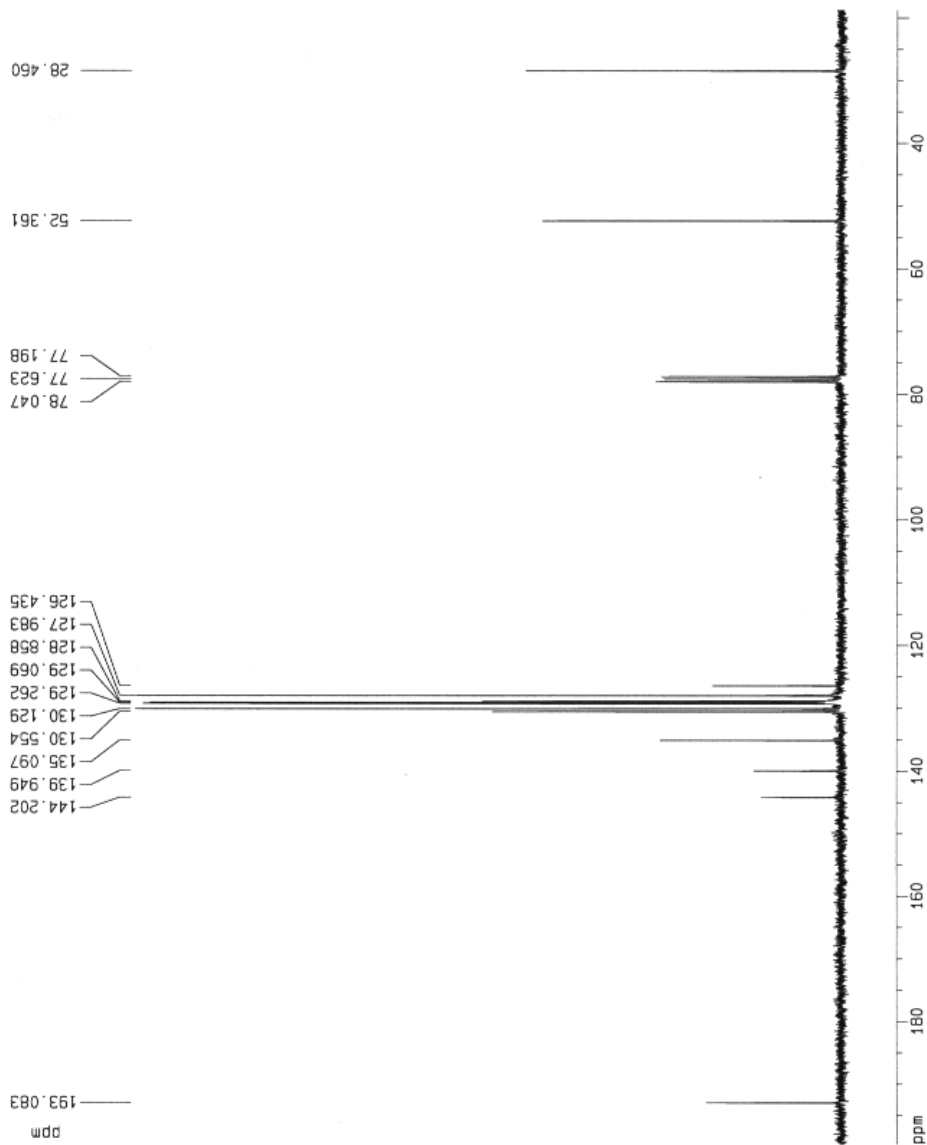

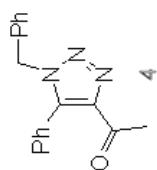

Current Data Parameters  
 NAME Jul25-mm-1-85  
 EXPNO 1  
 PROCNO 1  
 F2 - Acquisition Parameters  
 Date\_ 20060725  
 Time 16.24  
 INSTRUM spect  
 PROBHD 5 mm BBI 1H-B  
 PULPROG zg30  
 TD 33110  
 SOLVENT CDCl3  
 NS 16  
 DS 2  
 SWH 8278.146 Hz  
 FIDRES 0.250019 Hz  
 AQ 1.9998940 sec  
 RG 203.2  
 DM 60.400 usec  
 DE 6.00 usec  
 TE 300.0 K  
 D1 1.00000000 sec  
 ===== CHANNEL f1 =====  
 NUC1 1H  
 P1 6.45 usec  
 PL1 0.00 dB  
 SF01 400.1324710 MHz  
 F2 - Processing parameters  
 SI 32768  
 SF 400.1300000 MHz  
 WDW no  
 SSB 0  
 LB 0.00 Hz  
 GB 0  
 PC 1.00  
 1D NMR plot parameters  
 CX 20.00 cm  
 FJP 8.531 ppm  
 F1 3413.64 Hz  
 F2P -0.026 ppm  
 F2 -10.31 Hz  
 PPMCM 0.42785 ppm/cm  
 HZCM 171.19725 Hz/cm

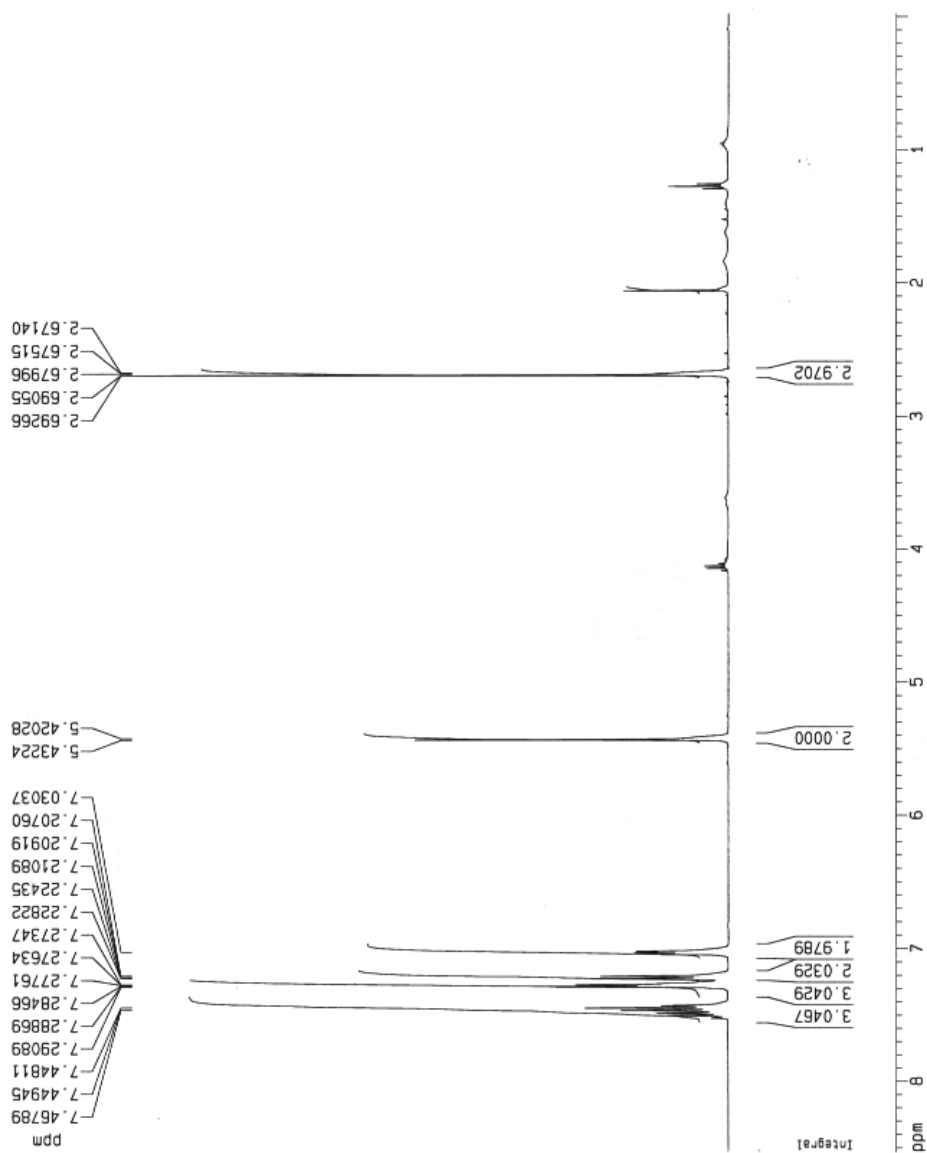

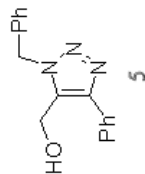

5

Current Data Parameters  
NAME 80r28-mm-1-44  
EXPNO 2  
PROCNO 1  
F2 - Acquisition Parameters  
Date\_ 20060426  
Time 15.37  
INSTRUM spect  
PROBHD 5 mm BBI 1H-6  
PULPROG zgpg30  
TD 65536  
SOLVENT CUC13  
NS 105  
DS 4  
SWH 25125.629 Hz  
FIDRES 0.363387 Hz  
AQ 1.3042164 sec  
RG 16384  
DM 19.900 usec  
DE 6.00 usec  
TE 300.0 K  
D1 2.00000000 sec  
d11 0.03000000 sec  
d12 0.00020000 sec  
===== CHANNEL f1 =====  
NUC1 13C  
P1 16.36 usec  
PL1 -6.00 dB  
SF01 100.6237959 MHz  
===== CHANNEL f2 =====  
CPDPRG2 waltz16  
NUC2 1H  
PCPD2 114.00 usec  
PL2 0.00 dB  
PL12 24.00 dB  
PL13 24.00 dB  
SF02 400.1316005 MHz  
F2 - Processing parameters  
SI 32768  
SF 100.6127290 MHz  
WDW EN  
SSB 0  
LB 1.00 Hz  
GB 0  
PC 1.40  
1D NMR plot parameters  
CX 20.00 cm  
FIP 160.032 ppm  
F1 16101.22 Hz  
F2P 34.408 ppm  
F2 3461.89 Hz  
PPMCM 6.28117 ppm/cm  
HZCM 631.96619 Hz/cm

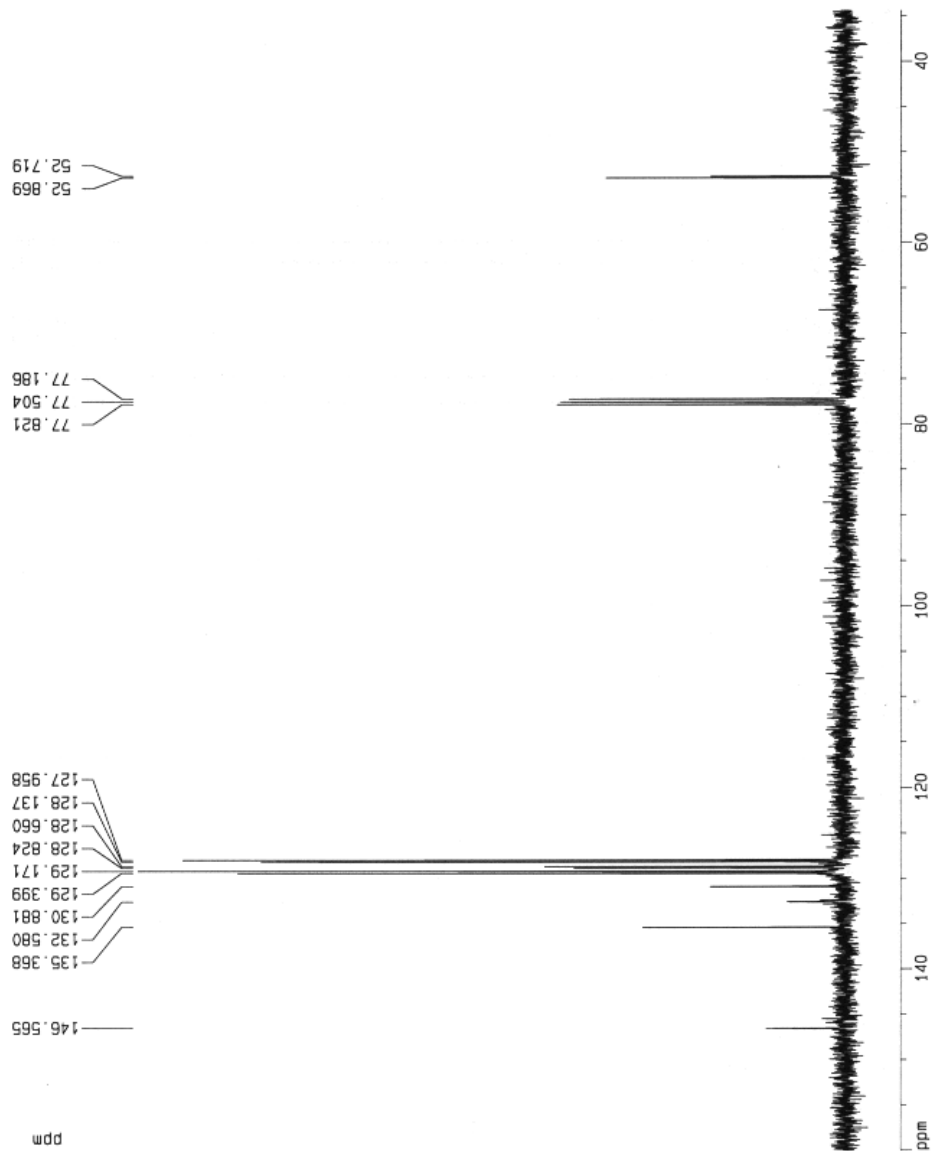

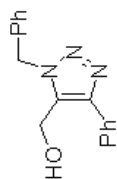

5

Current Data Parameters  
NAME apr27-mm-1-44  
EXPNO 2  
PROCNO 1

F2 - Acquisition Parameters  
Date\_ 20060427  
Time 17.34  
INSTRUM spect  
PROBHD 5 mm Multinu  
PULPROG zg30  
TD 24690  
SOLVENT CDCl3  
NS 16  
DS 2  
SWH 6172.839 Hz  
FIDRES 0.250014 Hz  
AQ 1.9999400 sec  
RG 256  
DM 81.000 usec  
DE 6.00 usec  
TE 300.0 K  
D1 1.00000000 sec

===== CHANNEL f1 =====  
NUC1 <sup>1</sup>H  
P1 9.60 usec  
PL1 -6.00 dB  
SF01 300.1318534 MHz

F2 - Processing parameters  
SI 32768  
SF 300.1300000 MHz  
WDW no  
SSB 0  
LB 0.00 Hz  
GB 0  
PC 1.00

1D NMR plot parameters  
CX 20.00 cm  
F1p 8.667 ppm  
F1 2501.20 Hz  
F2p -0.053 ppm  
F2 -15.02 Hz  
PPMCM 0.43602 ppm/cm  
HZCM 130.86127 Hz/cm

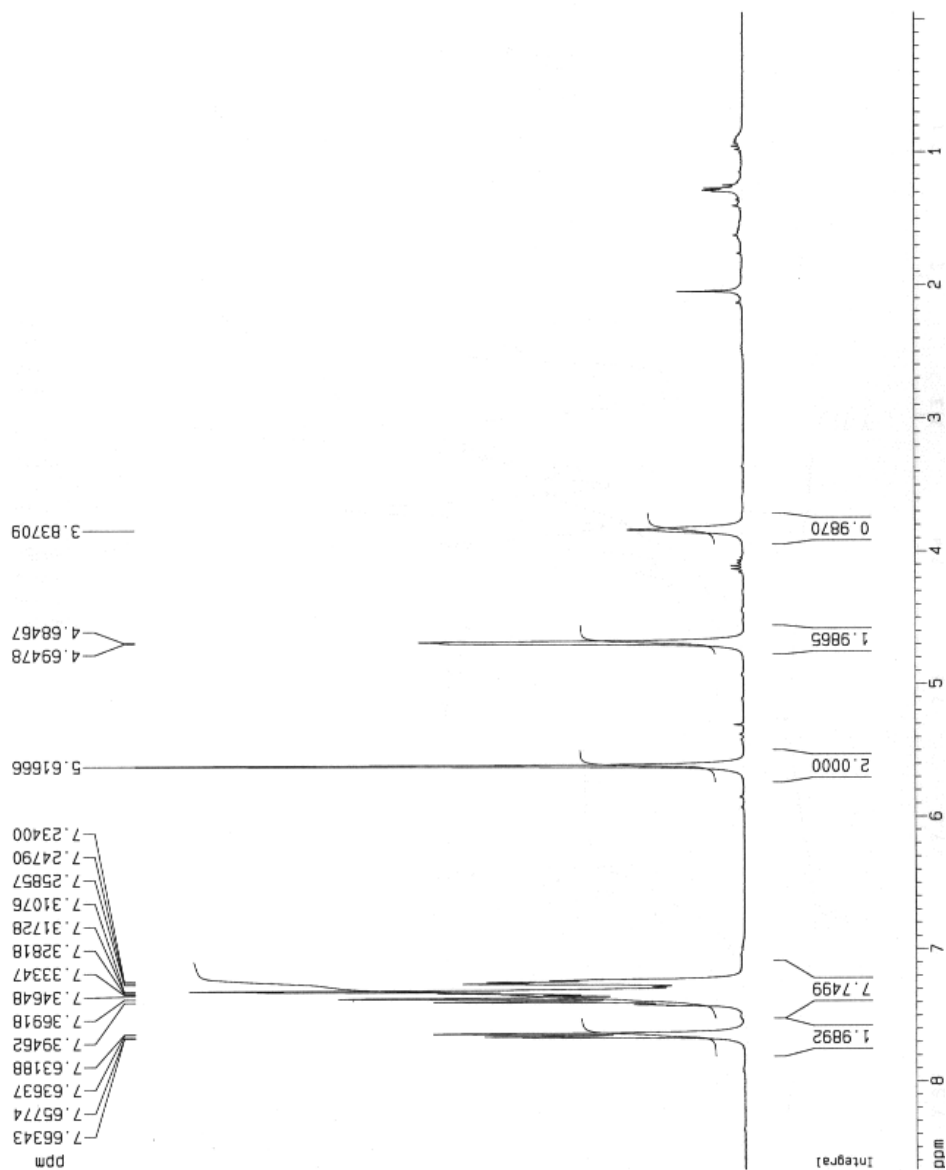

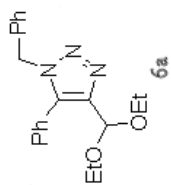

Current Data Parameters  
 NAME may5-mm-1-46  
 EXPNO 6  
 PROCNO 1

F2 - Acquisition Parameters

Date\_ 20060505  
 Time 18.50  
 INSTRUM spect  
 PROBR40 5 mm BB1 1H-B  
 PULPROG zgpg30  
 TO 65536  
 SOLVENT CDCl3  
 NS 101  
 DS 4  
 SWH 25125.629 Hz  
 AQ 1.3042164 sec  
 RG 16384  
 DW 19.900 usec  
 DE 6.00 usec  
 TE 300.0 K  
 D1 2.00000000 sec  
 d11 0.03000000 sec  
 d12 0.00002000 sec

===== CHANNEL f1 =====  
 NUC1 13C  
 P1 16.35 usec  
 PL1 -6.00 dB  
 SF01 100.6237959 MHz

===== CHANNEL f2 =====  
 CPDPRG2 waltz16  
 NUC2 1H  
 P2 114.00 usec  
 PL2 0.00 dB  
 PL12 24.00 dB  
 PL13 24.00 dB  
 SF02 400.1316005 MHz

F2 - Processing parameters  
 SI 32768  
 SF 100.6127290 MHz  
 WDM no  
 SSB 0  
 LB 0.00 Hz  
 GB 0  
 PC 1.40

1D NMR plot parameters  
 CX 20.00 cm  
 FIP 163.685 ppm  
 F1 16468.77 Hz  
 F2 -0.943 ppm  
 F2 -94.84 Hz  
 FREQN 8.23137 ppm/cm  
 HZCM 828.18666 Hz/cm

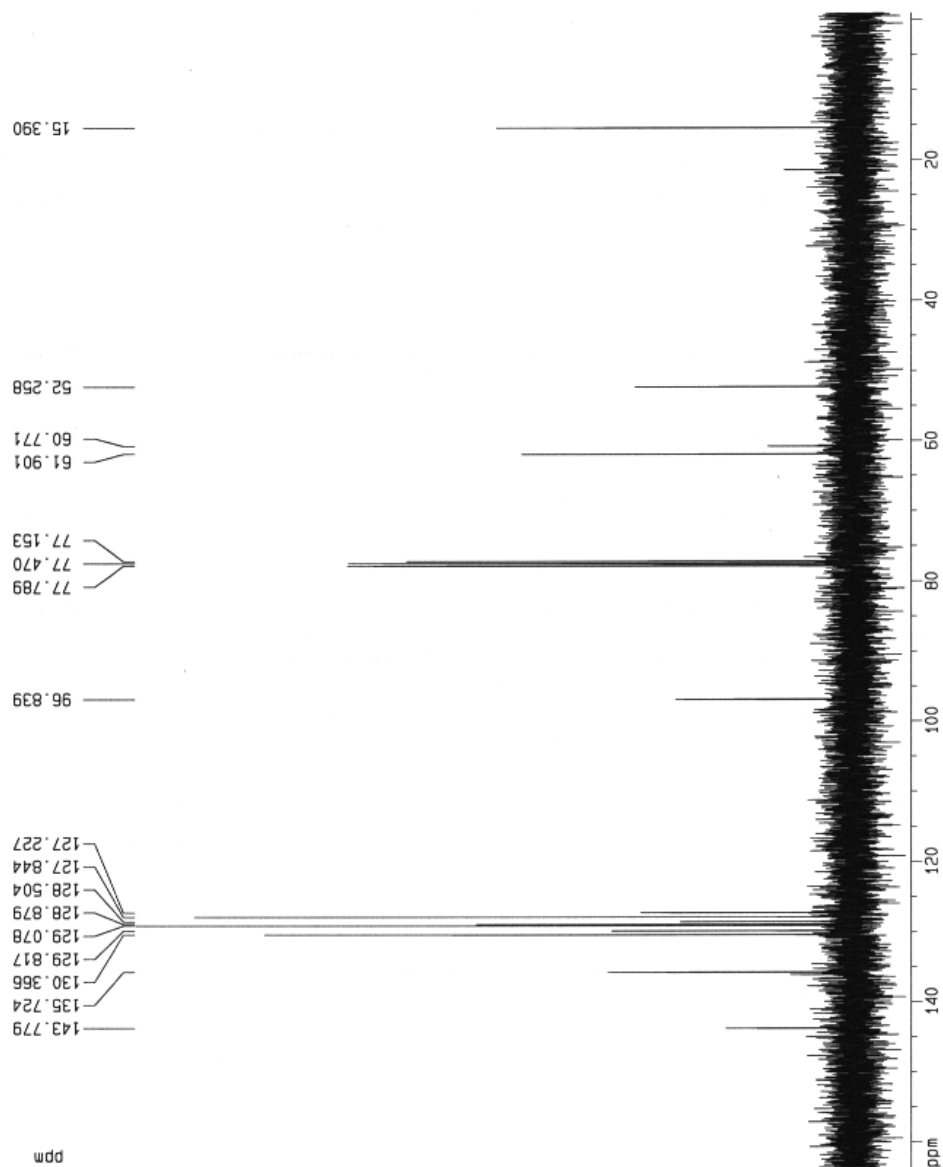



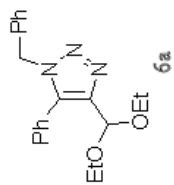

Current Data Parameters  
NAME mm-1-46  
EXPNO 1  
PROCNO 1  
F2 - Acquisition Parameters  
Date\_ 20060512  
Time 18.20  
INSTRUM spect  
PROBHD 5 mm BBI 1H-B  
PULPROG zg  
TO 65536  
SOLVENT CDCl3  
NS 1  
DS 0  
SWH 4222.973 Hz  
FIDRES 0.064437 Hz  
AQ 7.7595124 sec  
RG 50.8  
DM 118.400 usec  
DE 6.00 usec  
TE 300.0 K  
D1 1.00000000 sec  
\*\*\*\*\* CHANNEL f1 \*\*\*\*\*  
NUC1 1H  
P1 7.26 usec  
PL1 0.00 dB  
SF01 400.1317043 MHz  
F2 - Processing parameters  
SI 32768  
SF 400.1300000 MHz  
WDW no  
SSB 0  
LB 0.00 Hz  
GB 0  
PC 1.00  
1D NMR plot parameters  
CX 20.00 cm  
F1p 7.670 ppm  
F1 3066.67 Hz  
F2p 0.720 ppm  
F2 286.00 Hz  
PPMCM 0.34750 ppm/cm  
HZCM 139.04336 Hz/cm

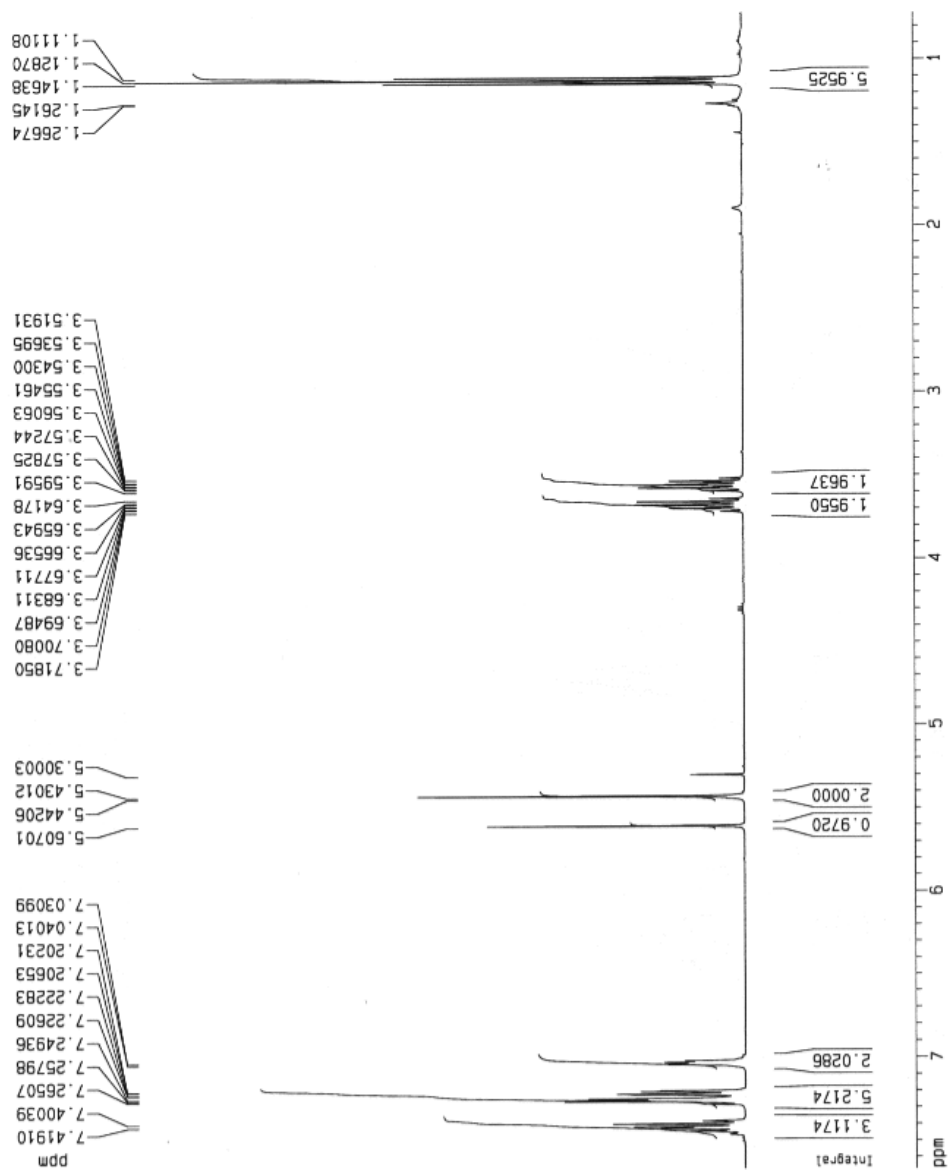

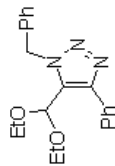

6b

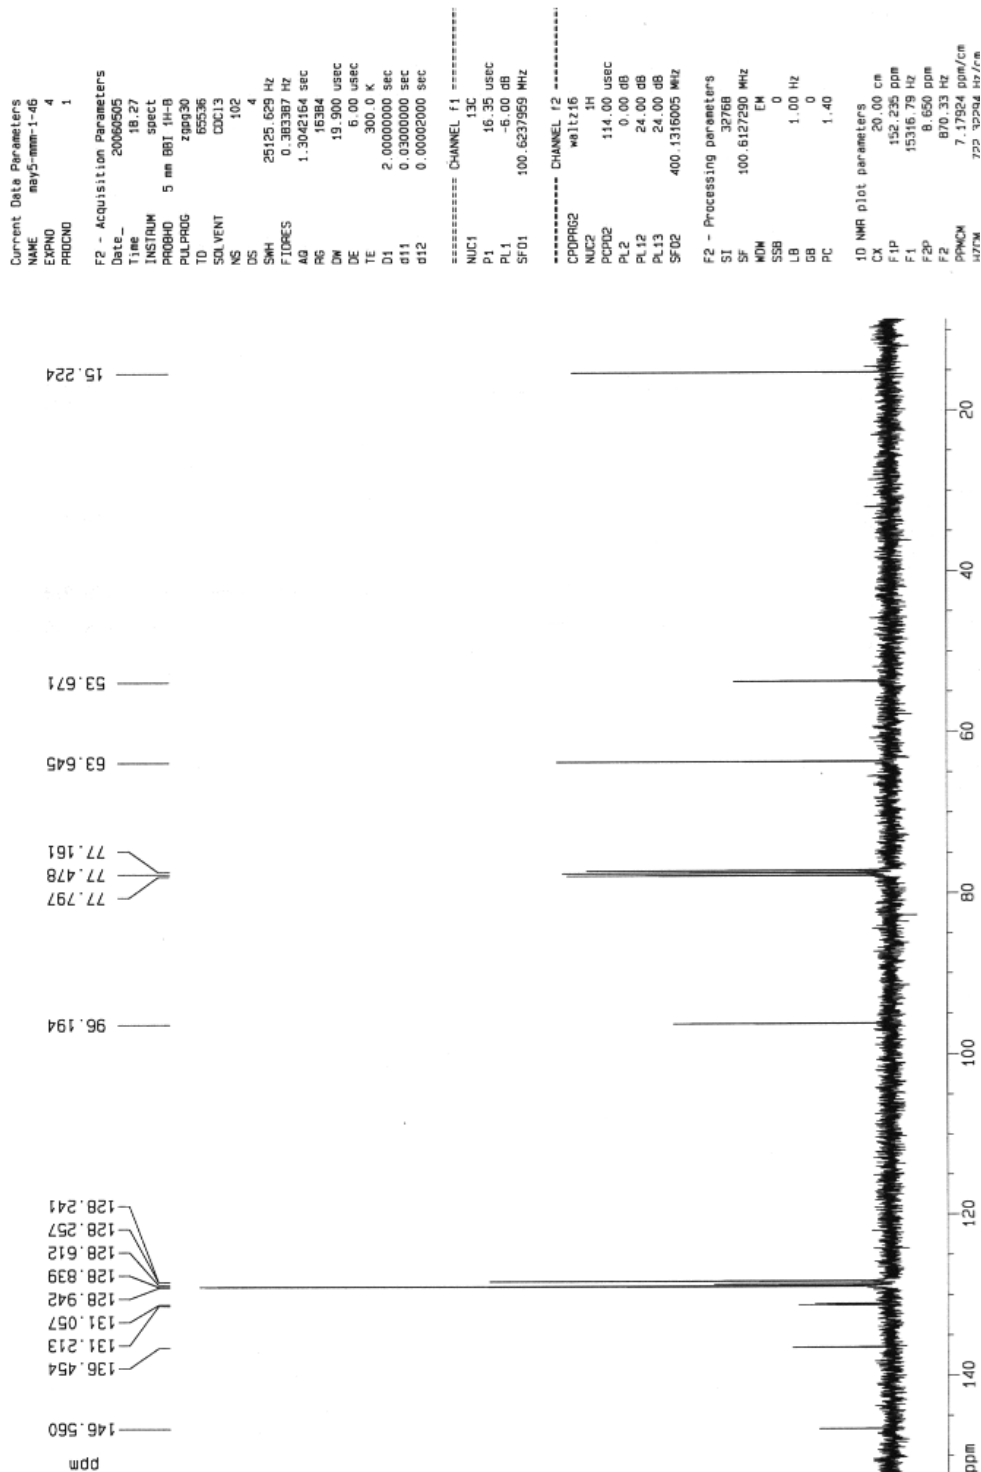

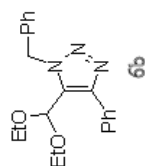

Current Data Parameters  
 NAME aug5-mm-1-46  
 EXPNO 1  
 PROCNO 1

F2 - Acquisition Parameters  
 Date\_ 20060805  
 Time 17.39  
 INSTRUM spect  
 PROBHD 5 mm GNP 1H/1  
 PULPROG zgpg30  
 TO 24690  
 SOLVENT CDCl3  
 NS 8  
 DS 2  
 SWH 6172.839 Hz  
 FIDRES 0.250014 Hz  
 AQ 1.9999400 sec  
 RG 161.3  
 DM 81.000 usec  
 DE 6.00 usec  
 TE 300.0 K  
 D1 1.00000000 sec

===== CHANNEL f1 =====  
 NUC1 1H  
 P1 11.70 usec  
 PL1 0.00 dB  
 SF01 299.8718518 MHz

F2 - Processing parameters  
 SI 32768  
 SF 299.8700000 MHz  
 WDW no  
 SSB 0  
 LB 0.00 Hz  
 GB 0  
 PC 1.00

1D NMR plot parameters  
 CX 20.00 cm  
 F1P 8.484 ppm  
 F1 2544.10 Hz  
 F2P 0.356 ppm  
 F2 106.70 Hz  
 PPM0H 0.40641 ppm/cm  
 HZ0H 121.87032 Hz/cm

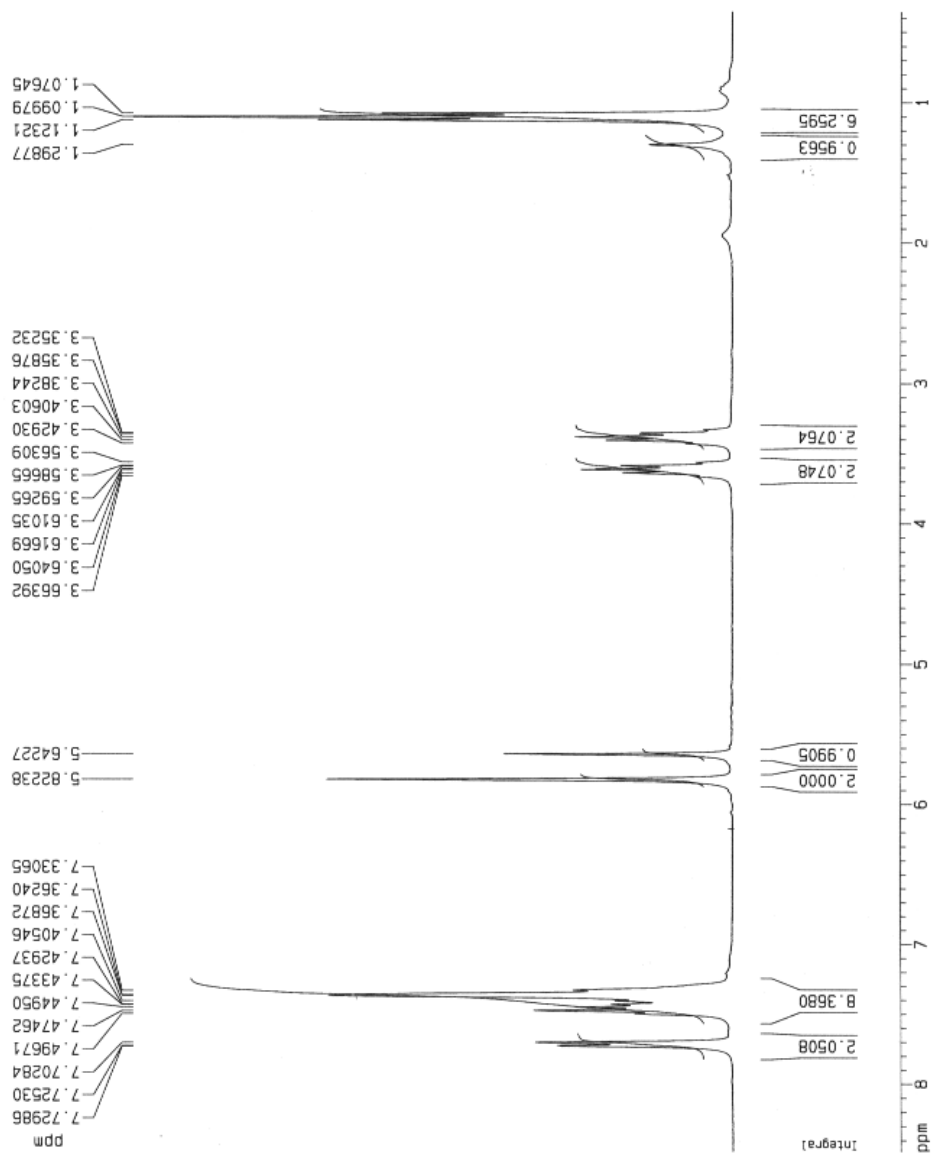

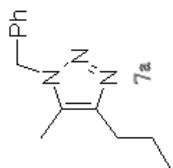

Current Data Parameters  
 NAME mm-1-55  
 EXPNO 1  
 PROCNO 1

F2 - Acquisition Parameters

Date\_ 20060806  
 Time 7.56  
 INSTRU spect  
 PROBD 5 mm QNP 1H/1  
 PULPROG zgpg30  
 TO 65536  
 SOLVENT CDCl3  
 NS 12595  
 DS 4  
 SWH 16736.952 Hz  
 FIDRES 0.286819 Hz  
 AQ 1.7433076 sec  
 RG 8192  
 DW 26.600 usec  
 DE 6.00 usec  
 TE 300.0 K  
 D1 2.00000000 sec  
 D11 0.03000000 sec  
 D12 0.0002000 sec

\*\*\*\*\* CHANNEL f1 \*\*\*\*\*  
 NUC1 13C  
 P1 5.40 usec  
 PL1 -6.00 dB  
 SF01 75.4106357 MHz

\*\*\*\*\* CHANNEL f2 \*\*\*\*\*  
 CPDPRG2 waltz16  
 NUC2 1H  
 PCPD2 115.00 usec  
 PL2 0.00 dB  
 PL12 20.00 dB  
 PL13 20.00 dB  
 SF02 299.8711995 MHz

F2 - Processing parameters  
 SI 32768  
 SF 75.4023410 MHz  
 WDW no  
 SSB 0  
 LB 0.00 Hz  
 GB 0  
 PC 1.40

1D NMR plot parameters  
 CX 20.00 cm  
 F1P 157.476 ppm  
 F1 11674.08 Hz  
 F2P -1.242 ppm  
 F2 -93.63 Hz  
 PPMCM 7.93590 ppm/cm  
 HZCM 588.38556 Hz/cm

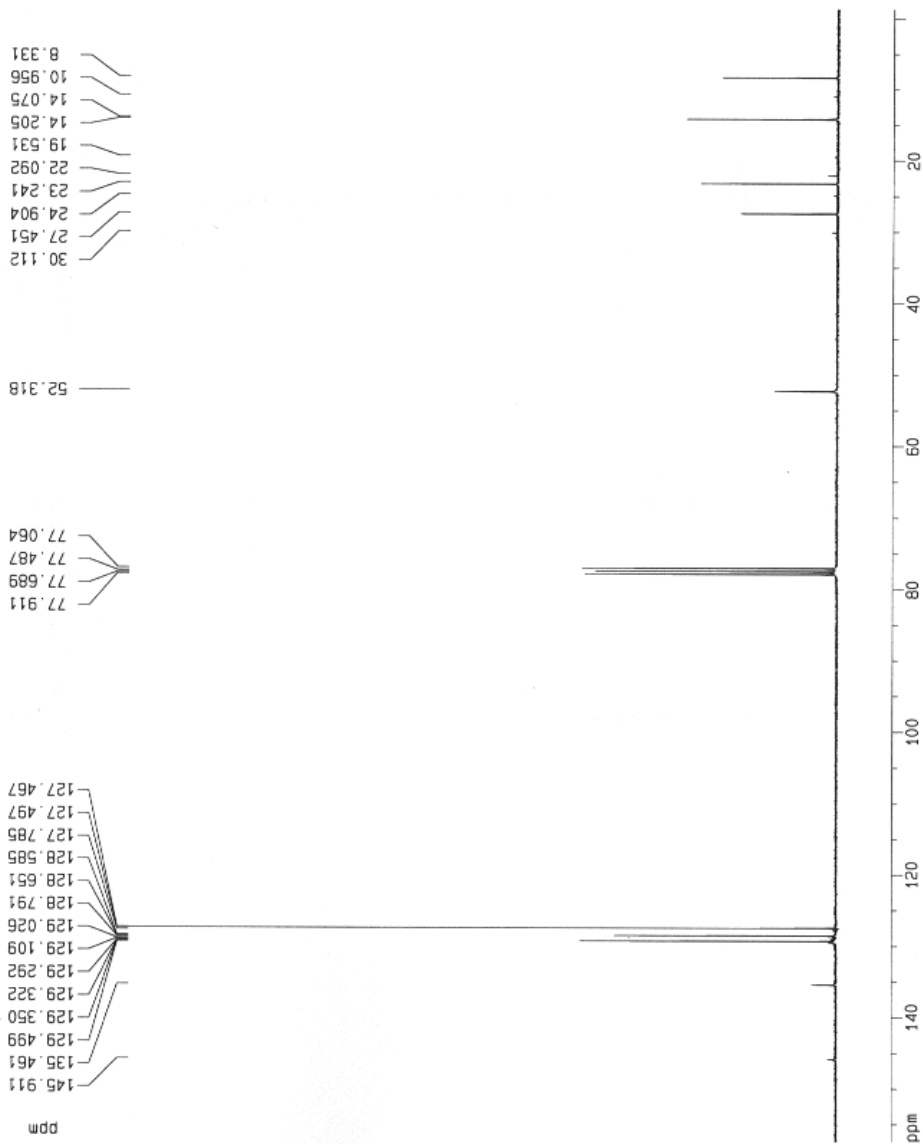

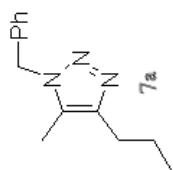

Current Data Parameters  
 NAME mm-1-56-1  
 EXPNO 1  
 PROCNO 1

F2 - Acquisition Parameters  
 Date\_ 20060530  
 Time 18.05  
 INSTRUM spect  
 PROBHD 5 mm BB1 1H-B  
 PULPROG zg30  
 TD 65536  
 SOLVENT CDCl3  
 NS 1  
 DS 2  
 SNH 4194.631 Hz  
 FIDRES 0.064005 Hz  
 AQ 7.8119411 sec  
 RG 32  
 DM 119.200 usec  
 DE 6.00 usec  
 TE 300.0 K  
 D1 1.00000000 sec

===== CHANNEL f1 =====  
 NUC1 1H  
 P1 7.16 usec  
 PL1 0.00 dB  
 SF01 400.1317125 MHz

F2 - Processing parameters  
 SI 32768  
 SF 400.1300000 MHz  
 MDW no  
 SSB 0  
 LB 0.00 Hz  
 GB 0  
 PC 1.00

1D NMR plot parameters  
 CX 20.00 cm  
 F1P 7.632 ppm  
 F1 3053.94 Hz  
 F2P 0.612 ppm  
 F2 245.08 Hz  
 PPMCM 0.35099 ppm/cm  
 HZCM 140.44315 Hz/cm

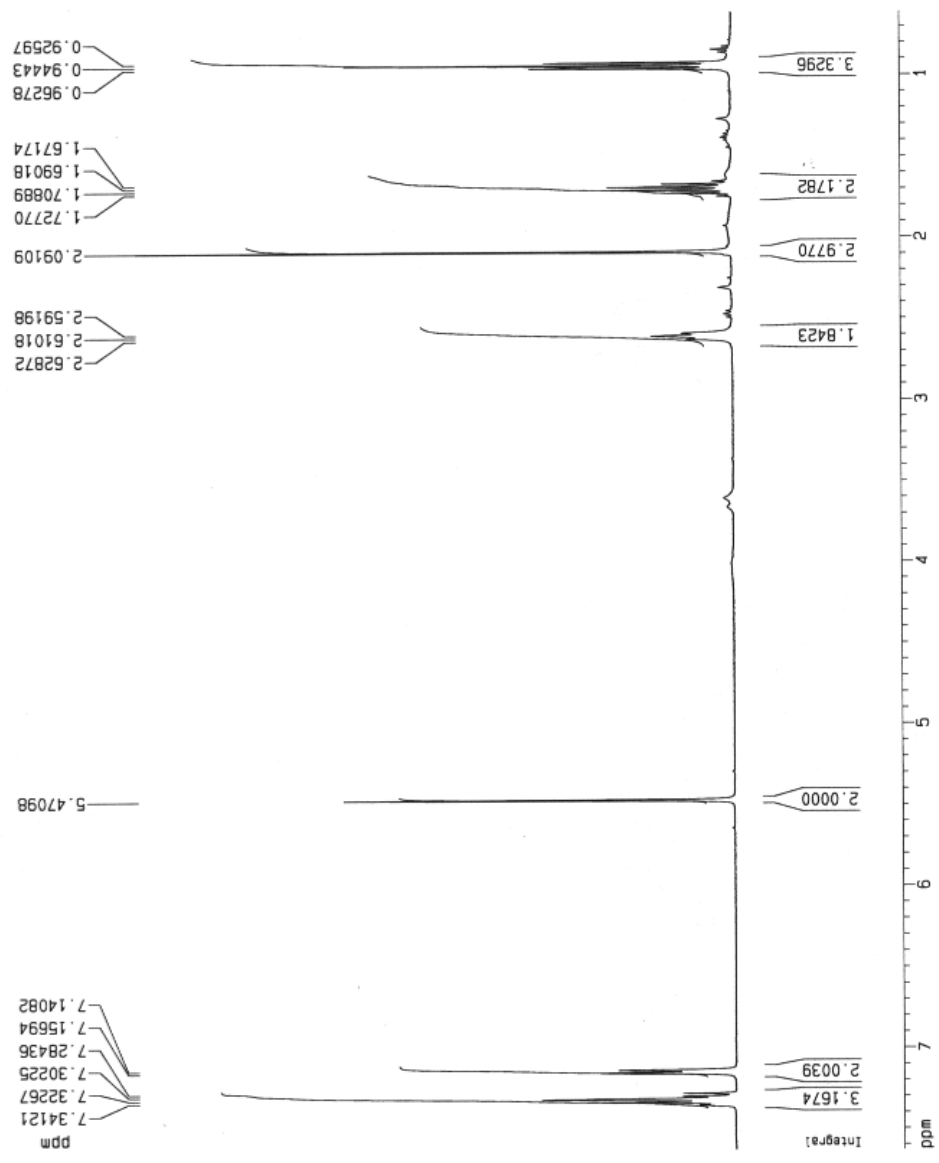

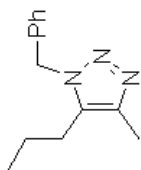

7b

Current Data Parameters  
 NAME may25-mm-1-56  
 EXPNO 1  
 PROCNO 1  
 F2 - Acquisition Parameters  
 Date\_ 20060529  
 Time 13.01  
 INSTRUM spect  
 PROBHD 5 mm BBI 1H-B  
 PULPROG zgpg30  
 TO 65536  
 SOLVENT CDCl3  
 NS 183  
 DS 4  
 SMH 25125.629 Hz  
 FIDRES 0.383387 Hz  
 AQ 1.3042164 sec  
 RG 8192  
 DM 19.900 usec  
 DE 6.00 usec  
 D1 2.00000000 sec  
 d11 0.03000000 sec  
 d12 0.00002000 sec  
 ----- CHANNEL f1 -----  
 NUC1 <sup>13</sup>C  
 P1 16.35 usec  
 PL1 -6.00 dB  
 SF01 100.6237959 MHz  
 ----- CHANNEL f2 -----  
 CPOPRG2 waltz16  
 NUC2 <sup>1</sup>H  
 PCPD2 114.00 usec  
 PL2 0.00 dB  
 PL12 24.00 dB  
 PL13 24.00 dB  
 SF02 400.1316005 MHz  
 F2 - Processing parameters  
 S1 32768  
 SF 100.6127290 MHz  
 WDM EM  
 SSB 0  
 LB 1.00 Hz  
 GB 0  
 PC 1.40  
 1D NMR plot parameters  
 CA 20.00 cm  
 F1P 150.184 ppm  
 F1 1510.47 Hz  
 F2P -0.142 ppm  
 F2 -14.29 Hz  
 PPMCM 7.51533 ppm/cm  
 HZCM 756.23810 Hz/cm

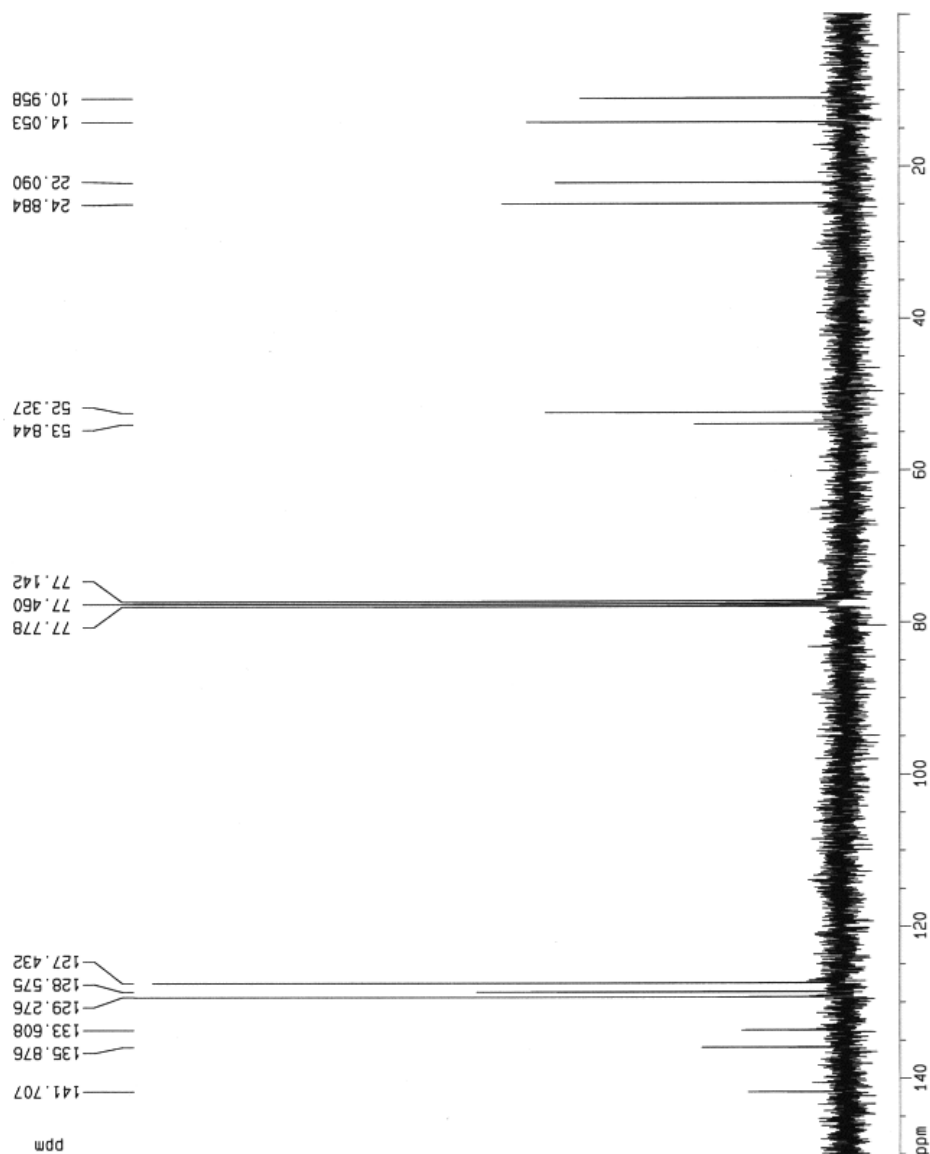

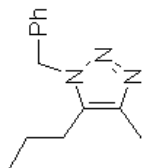

7b

Current Data Parameters  
 NAME mm-1-5b-2  
 EXPNO 1  
 PROCNO 1  
 F2 - Acquisition Parameters  
 Date\_ 20060524  
 Time 18.46  
 INSTRUM spect  
 PROBHD 5 mm BBI 1H-B  
 PULPROG zg  
 TO 65536  
 SOLVENT CDCl3  
 NS 1  
 DS 0  
 SWH 4194.631 Hz  
 FIDRES 0.064005 Hz  
 AQ 7.8119411 sec  
 RG 57  
 DM 119.200 usec  
 DE 6.00 usec  
 TE 300.0 K  
 D1 1.00000000 sec  
 ===== CHANNEL f1 =====  
 NUC1 1H  
 P1 7.25 usec  
 PL1 0.00 dB  
 SF01 400.1316134 MHz  
 F2 - Processing parameters  
 SI 32768  
 SF 400.1300000 MHz  
 WDW no  
 SSB 0  
 LB 0.00 Hz  
 GB 0  
 PC 1.00  
 1D NMR plot parameters  
 CX 20.00 cm  
 F1P 7.605 ppm  
 F1 3043.54 Hz  
 F2p 0.552 ppm  
 F2 220.68 Hz  
 PPMCM 0.35274 ppm/cm  
 HZCM 141.14304 Hz/cm

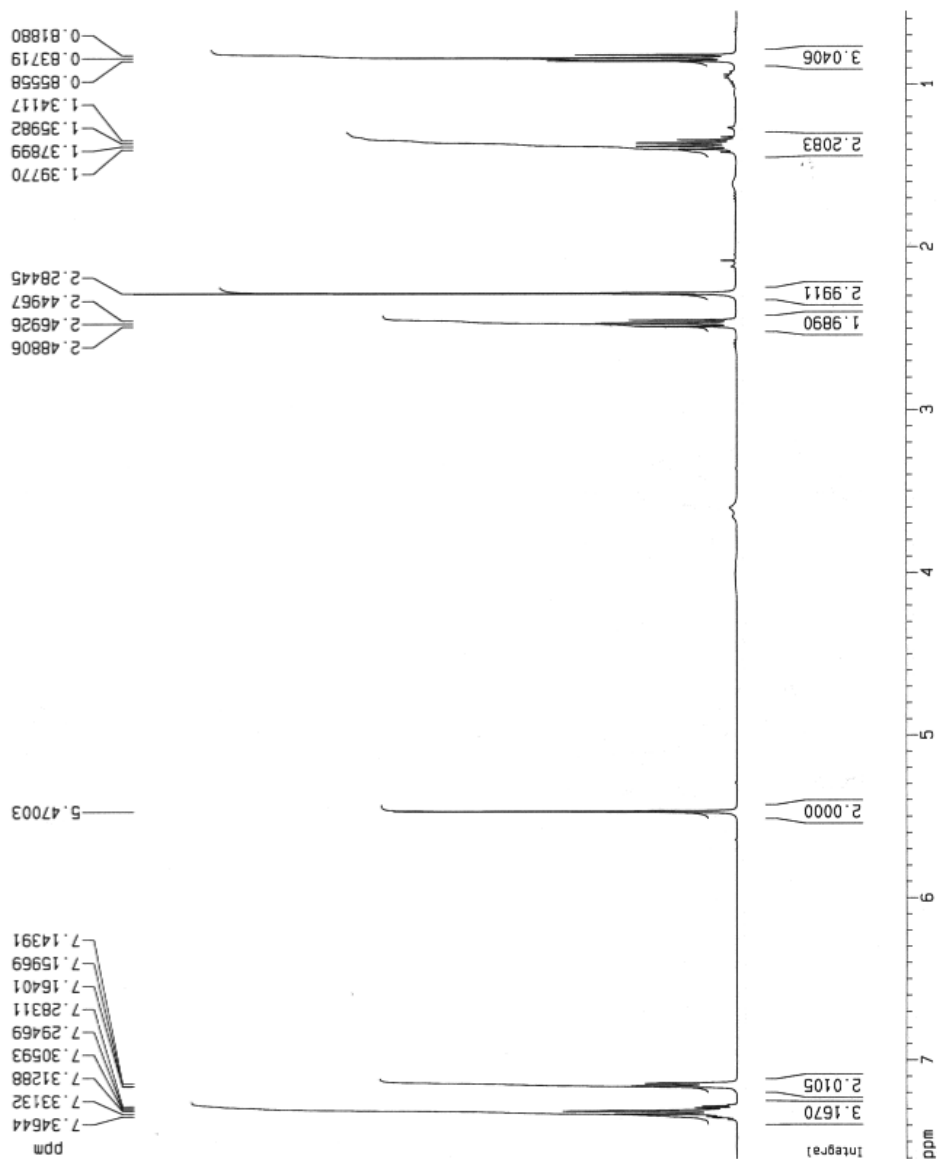

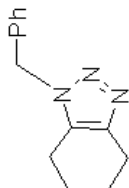

8

Current Data Parameters  
NAME Jun25-mm-1-77  
EXPNO 2  
PROCNO 1

F2 - Acquisition Parameters

Date\_ 20060629  
Time 15.12  
INSTRUM spect  
PROBHD 5 mm QNP 1H/1  
PULPROG zgpg30  
TD 65536  
SOLVENT CDCl3  
NS 41  
DS 4  
SWH 18795.992 Hz  
FIDRES 0.266819 Hz  
AQ 1.7433076 sec  
RG 1024  
DM 26.600 usec  
DE 6.00 usec  
TE 300.0 K  
D1 2.0000000 sec  
D11 0.0300000 sec  
D12 0.0002000 sec

===== CHANNEL f1 =====  
NUC1 13C  
P1 5.40 usec  
PL1 -6.00 dB  
SF01 75.4106357 MHz

===== CHANNEL f2 =====  
CPDPRG2 waltz16  
NUC2 1H  
PCPD2 115.00 usec  
PL2 0.00 dB  
PL12 20.00 dB  
PL13 20.00 dB  
SF02 299.8711995 MHz

F2 - Processing parameters  
S1 32768  
SF 75.4023410 MHz  
WDW EM  
SSB 0  
LB 1.00 Hz  
GB 0  
PC 1.40

1D NMR plot parameters  
CX 20.00 cm  
F1P 154.932 DDM  
F1 11681.49 Hz  
F2P 6.105 DDM  
F2 460.41 Hz  
PPMCH 7.44680 ppm/cm  
HZCH 561.05396 Hz/cm

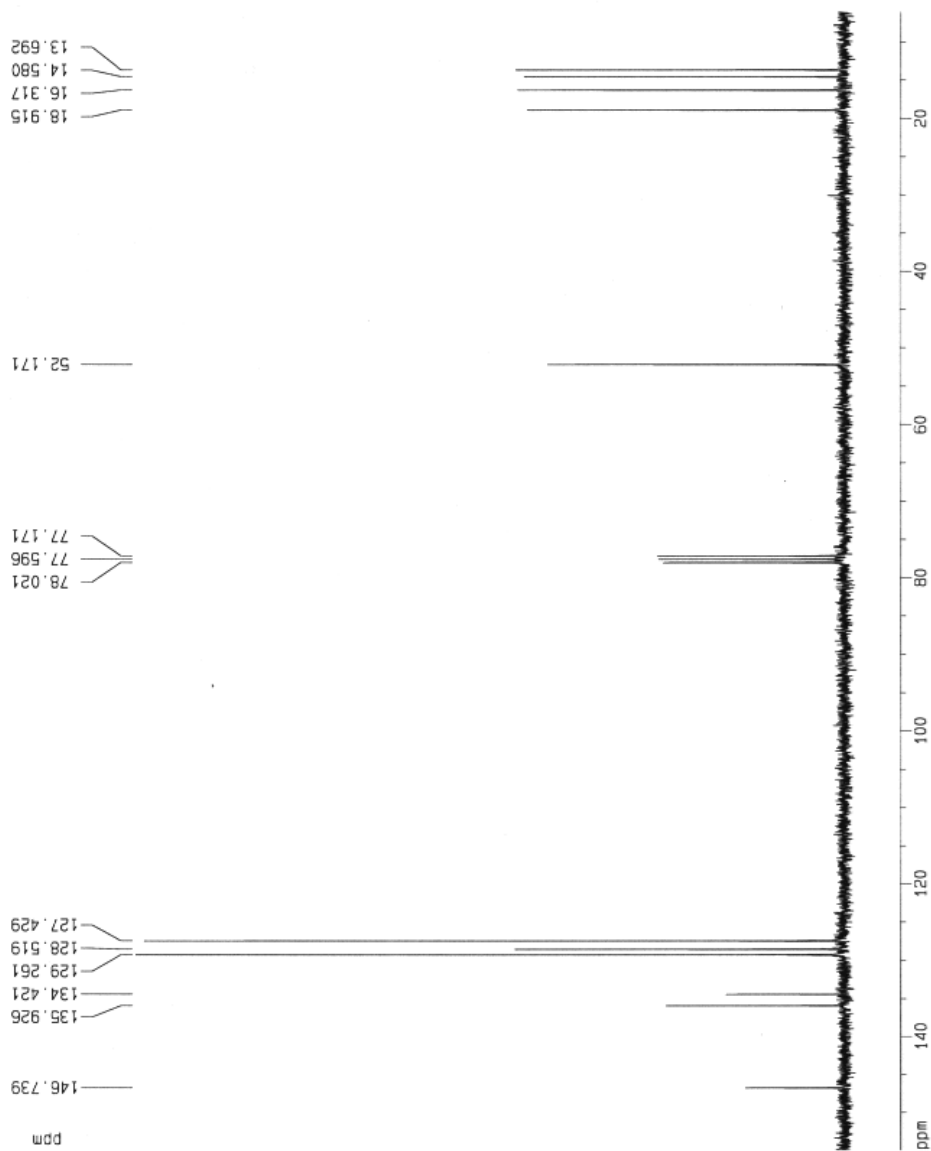



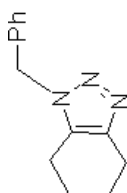

8

# Current Data Parameters

NAME Jun29-mm-1-77  
EXPNO 1  
PROCNO 1

## F2 - Acquisition Parameters

Date\_ 20060629  
Time 8.03  
INSTRUM spect  
PULPROG 5 mm GNP 1H/1  
TD 2930  
SOLVENT CDCl3  
NS 16  
DS 2  
SWH 6172.839 Hz  
FIDRES 0.094190 Hz  
AQ 5.3084660 sec  
RG 57  
DM 81.000 usec  
DE 6.00 usec  
TE 300.0 K  
D1 1.00000000 sec

## ----- CHANNEL f1 -----

NUC1 1H  
P1 11.70 usec  
PL1 0.00 dB  
SF01 299.8718518 MHz

## F2 - Processing parameters

SI 32768  
SF 299.8700000 MHz  
WDW no  
SSB 0  
LB 0.00 Hz  
GB 0  
PC 1.00

## 1D NMR plot parameters

CX 20.00 cm  
F1P 8.192 ppm  
F1 2456.54 Hz  
F2P 0.021 ppm  
F2 6.26 Hz  
PPMCM 0.40856 ppm/cm  
HZCM 122.51437 Hz/cm

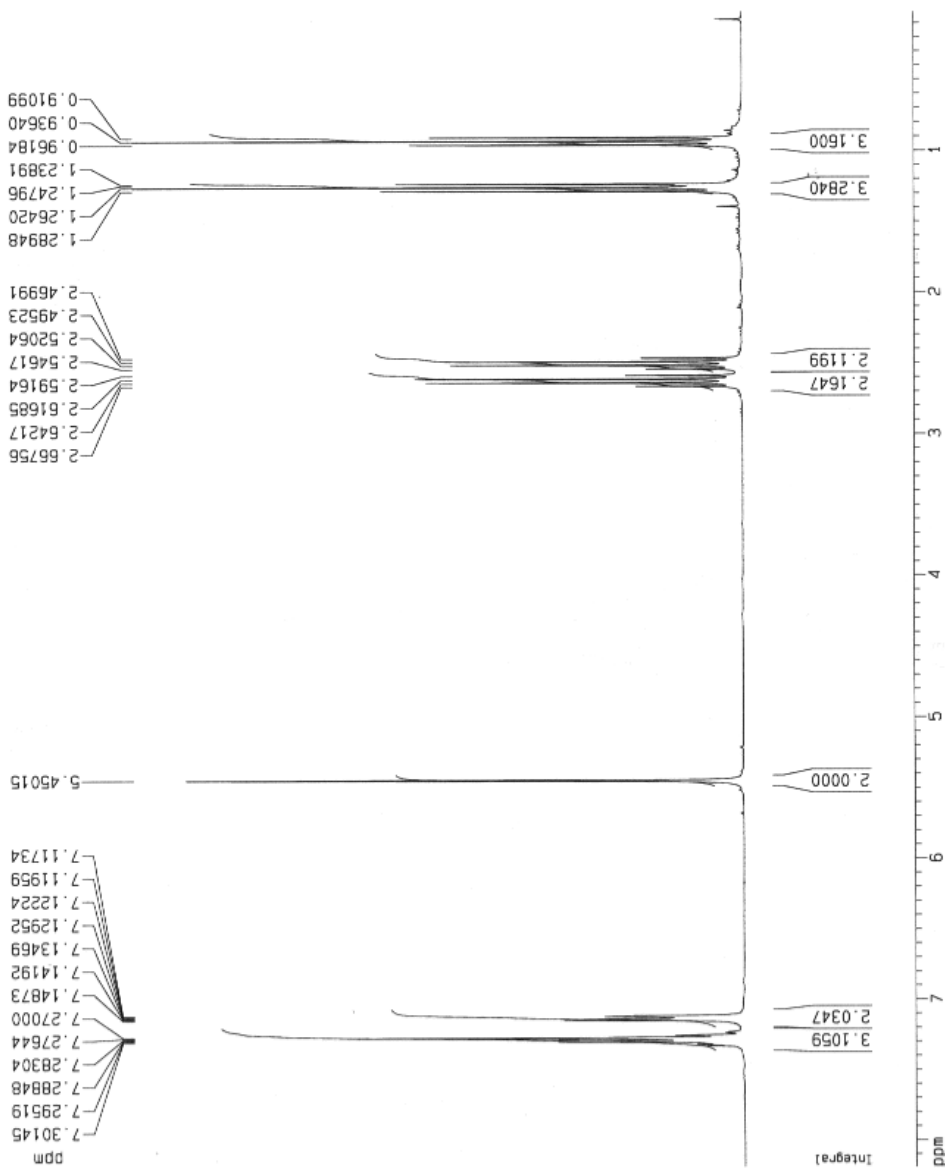



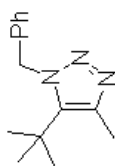

9

Current Data Parameters  
NAME mm-1-86-1a  
EXPNO 1  
PROCNO 1

F2 - Acquisition Parameters  
Date\_ 20060725  
Time 21.46  
INSTRUM spect  
PROBHD 5 mm BBI 1H-B  
PULPROG zg30  
TD 65536  
SOLVENT CDCl3  
NS 16  
DS 2  
SWH 8278.146 Hz  
FIDRES 0.126314 Hz  
AQ 3.9584243 sec  
RG 128  
DW 60.400 usec  
DE 6.00 usec  
TE 300.0 K  
D1 1.0000000 sec

===== CHANNEL f1 =====  
NUC1 1H  
P1 6.45 usec  
PL1 0.00 dB  
SFO1 400.1324710 MHz

F2 - Processing parameters  
SI 32768  
SF 400.1300000 MHz  
WDW no  
SSB 0  
LB 0.00 Hz  
GB 0  
PC 1.00

1D NMR plot parameters  
CX 20.00 cm  
F1P 7.936 ppm  
F1 3175.26 Hz  
F2P 0.191 ppm  
F2 76.37 Hz  
PPMCM 0.381723 ppm/cm  
HZCM 154.94434 Hz/cm

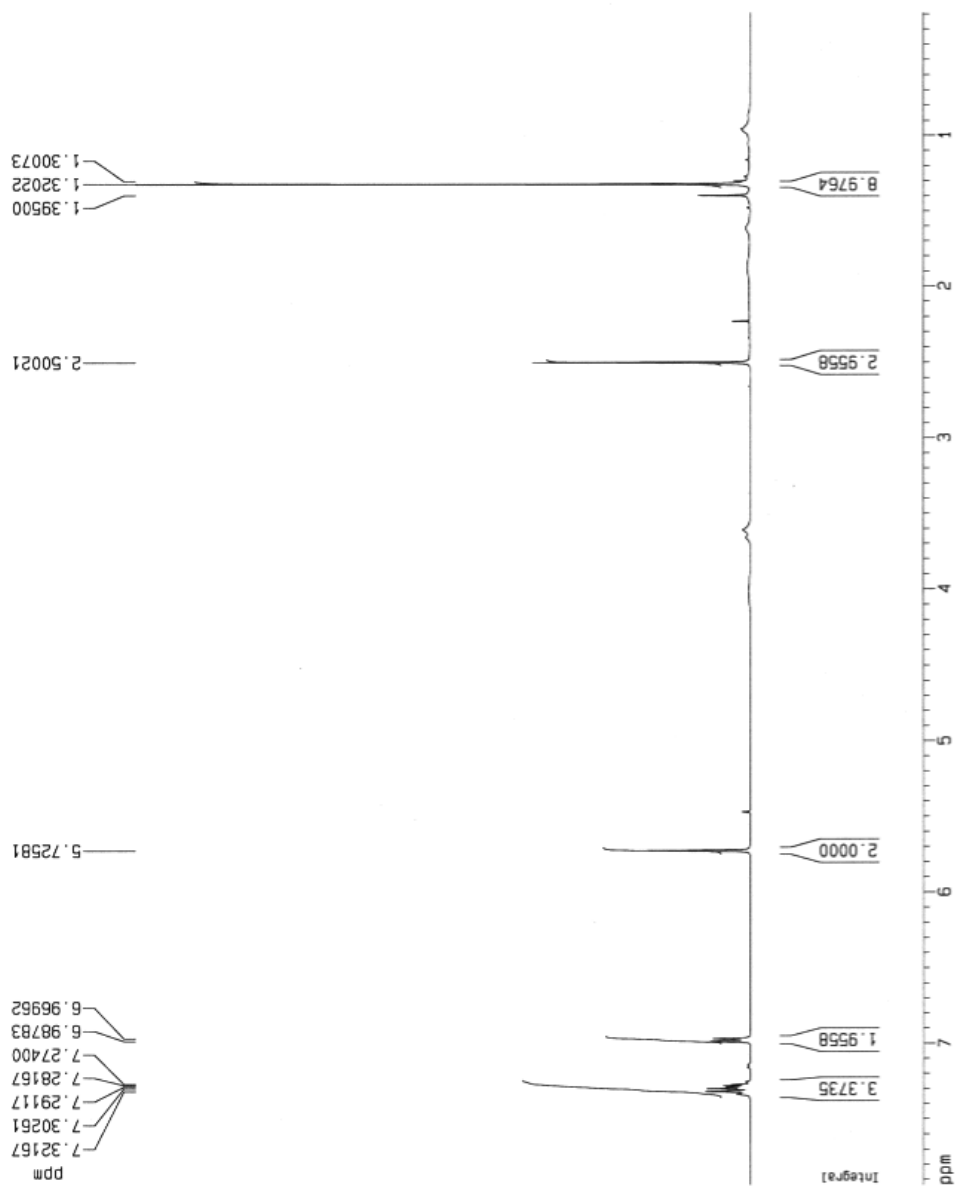

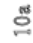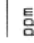

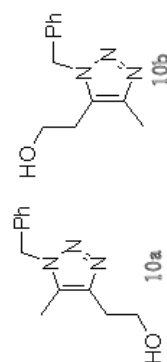

Current Data Parameters  
NAME mm-1-8b-mix  
EXPNO 1  
PROCNO 1

F2 - Acquisition Parameters  
Date\_ 20060731  
Time 20.30  
INSTRUM spect  
PROBHD 5 mm BBI 1H-B  
PULPROG zg  
TD 65536  
SOLVENT CDCl3  
NS 1  
DS 0  
SWH 3634.356 Hz  
FIDRES 0.058508 Hz  
AQ 8.5459442 sec  
RG 50.8  
DM 130.400 usec  
DE 6.00 usec  
TE 300.0 K  
D1 1.00000000 sec

===== CHANNEL f1 =====  
NUC1 1H  
P1 7.63 usec  
PL1 0.00 dB  
SF01 400.1315728 MHz

F2 - Processing parameters  
SI 32768  
SF 400.1300000 MHz  
WDW no  
SSB 0  
LB 0.00 Hz  
GB 0  
PC 1.00

1D NMR plot parameters  
CX 20.00 cm  
F1P 7.710 ppm  
F1 3084.98 Hz  
F2P 0.317 ppm  
F2 126.67 Hz  
PPM0 0.3687 ppm/cm  
HZCM 147.91545 Hz/cm

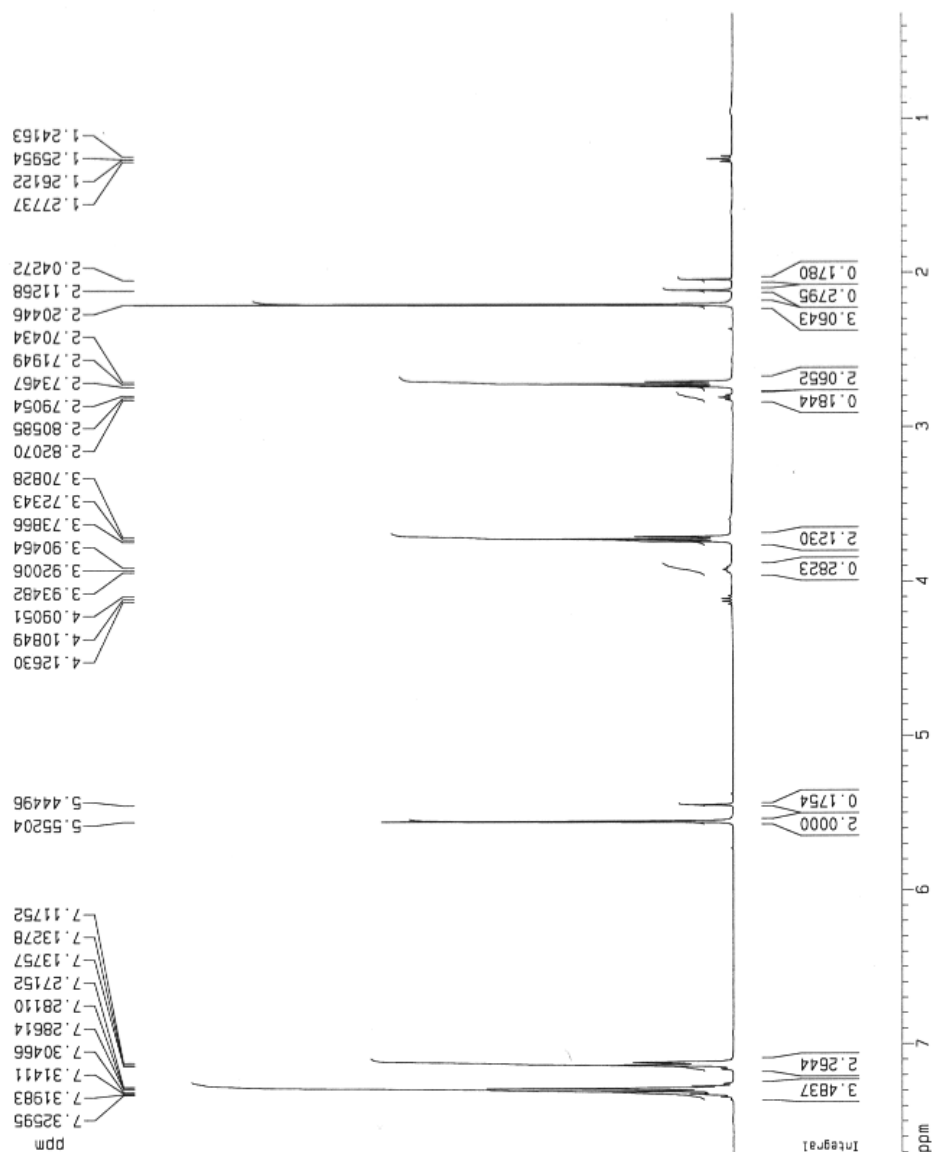

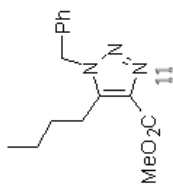

Current Data Parameters  
NAME mmn-1-35  
EXPNO 1  
PROCNO 1  
F2 - Acquisition Parameters  
Date\_ 20060720  
Time 21.37  
INSTRUM spect  
PROBHD 5 mm QNP 1H/1  
PULPROG zgpg30  
TD 65536  
SOLVENT CDCl3  
NS 49  
DS 4  
SWH 16796.992 Hz  
FIDRES 0.286819 Hz  
AQ 1.7433076 sec  
RG 512  
DM 26.600 usec  
DE 6.00 usec  
TE 300.0 K  
D1 2.0000000 sec  
D11 0.0300000 sec  
D12 0.0002000 sec  
===== CHANNEL f1 =====  
NUC1 13C  
P1 5.40 usec  
PL1 -6.00 dB  
SFO1 75.4106357 MHz  
===== CHANNEL f2 =====  
CPDPRG2 waltz16  
NUC2 1H  
PCPD2 115.00 usec  
PL2 0.00 dB  
PL12 20.00 dB  
PL13 20.00 dB  
SFO2 299.8711995 MHz  
F2 - Processing parameters  
SI 32768  
SF 75.4023410 MHz  
WDW ro  
SSB 0  
LB 0.00 Hz  
GB 0  
PC 1.40  
1D NMR plot parameters  
CX 20.00 cm  
F1P 171.211 ppm  
F1 12909.70 Hz  
F2P 1.851 ppm  
F2 139.55 Hz  
PPHM 6.46801 ppm/cm  
HZCM 638.50775 Hz/cm

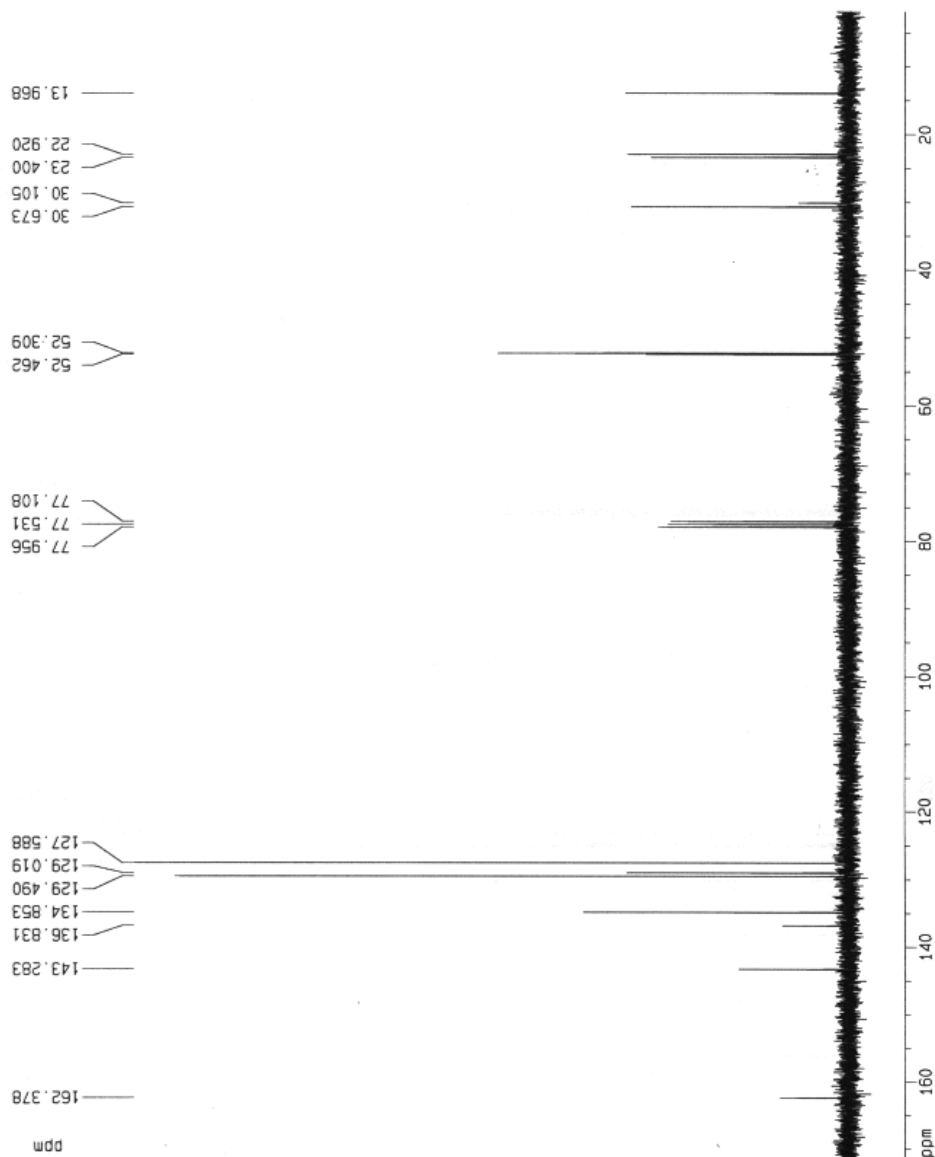

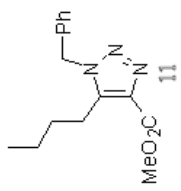

Current Data Parameters

NAME MM-1-36  
EXPNO 1  
PROCNO 1

F2 - Acquisition Parameters

Date\_ 20060323  
Time 16.59  
INSTRUM spect  
PQ08H0 5 mm BBI 1H-B  
PULPROG zg30  
TD 65536  
SOLVENT CDCl3  
NS 10  
DS 2  
SWH 8278.146 Hz  
FIDRES 0.126314 Hz  
AQ 3.9584243 sec  
RG 128  
DM 60.400 usec  
DE 6.00 usec  
TE 300.0 K  
D1 1.00000000 sec

----- CHANNEL f1 -----

NUC1 1H  
P1 6.45 usec  
PL1 0.00 dB  
SFO1 400.1324710 MHz

F2 - Processing parameters

SI 32768  
SF 400.1300054 MHz  
WDW EM  
SSB 0  
LB 0.30 Hz  
GB 0  
PC 1.00

10 NMR plot parameters

CX 20.00 cm  
F1P 10.500 ppm  
F1 4201.37 Hz  
F2P -0.500 ppm  
F2 -200.07 Hz  
PPMCM 0.35000 ppm/cm  
HZCM 220.07150 Hz/cm

0.79803  
0.81553  
0.83266  
1.22353  
1.24202  
1.25942  
1.27554  
1.28474  
1.30837  
2.82594  
2.84502  
2.86355  
3.92121  
5.53129  
7.14791  
7.16128  
7.16692  
7.27004  
7.31037  
7.32750  
7.33640  
7.34048

3.2965  
2.1578  
4.1106  
2.0000  
2.9796  
2.0085  
3.0439  
2.0278

ppm

Integral

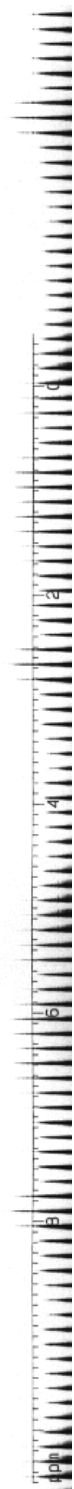

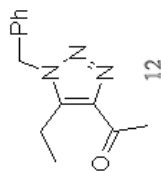

Current Data Parameters  
 NAME jvl125-mm-1-87  
 EXPNO 1  
 PROCNO 1

F2 - Acquisition Parameters  
 Date\_ 20060725  
 Time 8.05  
 INSTRUM spect  
 PULPROG zgpg30  
 TO 65336  
 SOLVENT CDCl3  
 NS 71  
 DS 4  
 SWH 25125.629 Hz  
 FIDRES 0.363867 Hz  
 AQ 1.3042184 sec  
 RG 16384  
 DM 19.900 usec  
 DE 6.00 usec  
 TE 300.0 K  
 D1 2.00000000 sec  
 d11 0.03000000 sec  
 d12 0.00002000 sec

===== CHANNEL f1 =====  
 NUC1 <sup>13</sup>C  
 P1 16.35 usec  
 PL1 -6.00 dB  
 SF01 100.6237559 MHz

===== CHANNEL f2 =====  
 CPDPRG2 waltz16  
 NUC2 <sup>1</sup>H  
 PCDP2 114.00 usec  
 PL2 0.00 dB  
 PL12 24.00 dB  
 PL13 24.00 dB  
 SF02 400.1316005 MHz

F2 - Processing parameters  
 SI 32768  
 SF 100.6127250 MHz  
 WDM 0  
 EQ 0  
 LB 1.00 Hz  
 GB 0  
 PC 1.40

1D NMR plot parameters  
 CX 20.00 cm  
 FIP 234.858 ppm  
 F1 23629.72 Hz  
 F2 -14.868 ppm  
 F2 -1495.90 Hz  
 PPMCM 12.48631 ppm/cm  
 HZCM 1256.28137 Hz/cm

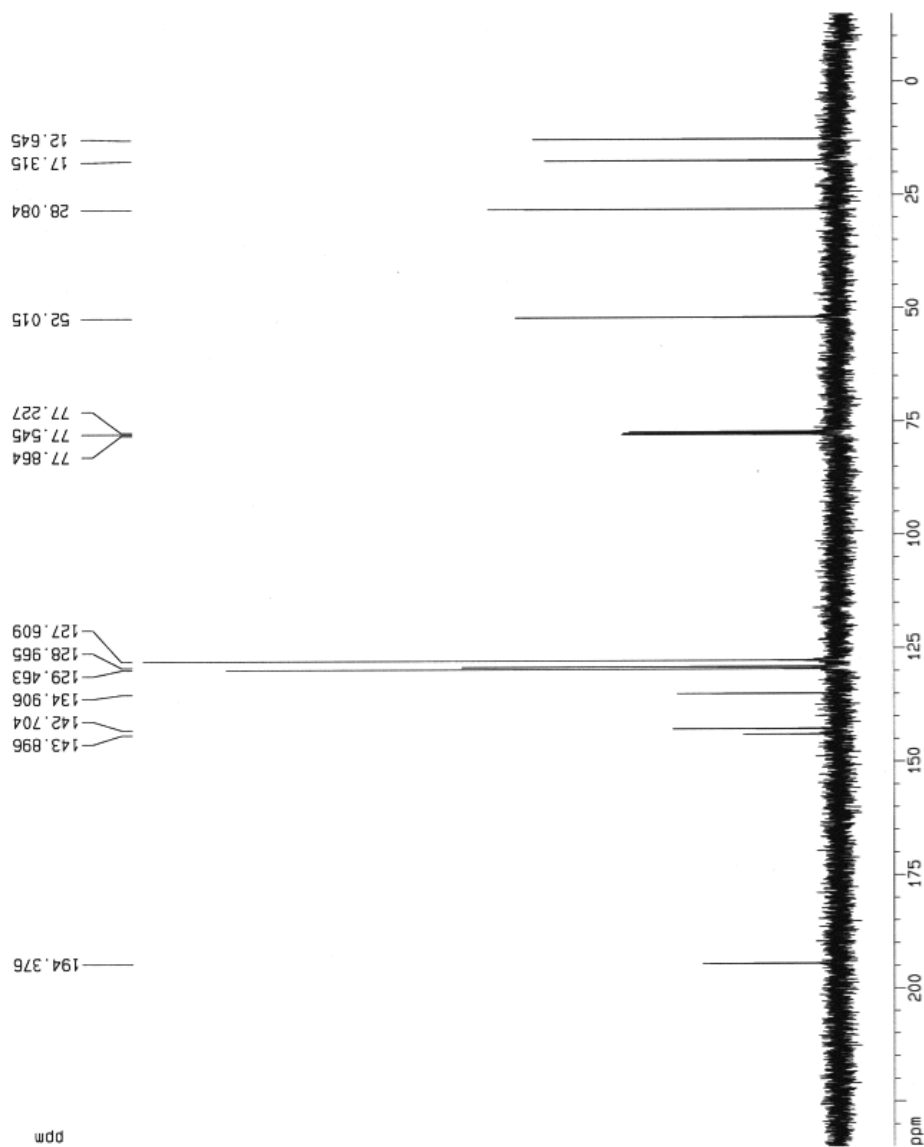



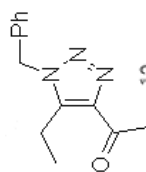

12

Current Data Parameters  
NAME mm-1-B7  
EXPNO 1  
PROCNO 1

F2 - Acquisition Parameters

Date\_ 20060724  
Time\_ 18.47  
INSTRUM spect  
PROBHD 5 mm BBI 1H-5  
PULPROG zg30  
TD 65536  
SOLVENT CDCl3  
NS 16  
DS 2  
SWH 8278.146 Hz  
FIDRES 0.126314 Hz  
AQ 3.9584243 sec  
RG 32  
DM 60.400 usec  
DE 6.00 usec  
TE 300.0 K  
D1 1.0000000 sec

\*\*\*\*\* CHANNEL f1 \*\*\*\*\*

NUC1 1H  
P1 6.45 usec  
PL1 0.00 dB  
SF01 400.1324710 MHz

F2 - Processing parameters

SI 32768  
SF 400.1300000 MHz  
WDW no  
SSB 0  
LB 0.00 Hz  
GB 0  
PC 1.00

1D NMR plot parameters

CX 20.00 cm  
F1P 7.732 ppm  
F1 3093.74 Hz  
F2P 0.285 ppm  
F2 113.59 Hz  
PPMCM 0.37235 ppm/cm  
HZCM 146.98746 Hz/cm

0.96780  
0.94907  
0.94797  
0.93021

2.91728  
2.89845  
2.87958  
2.86074  
2.67111  
2.66923

5.51433

7.32335  
7.31033  
7.30495  
7.18285  
7.18170  
7.17985  
7.17781  
7.17697  
7.16294  
7.16127

3.1417

3.1518

2.1856

2.0000

2.1150

3.9974

Integral

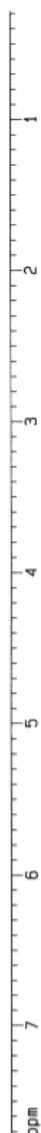

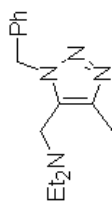

13

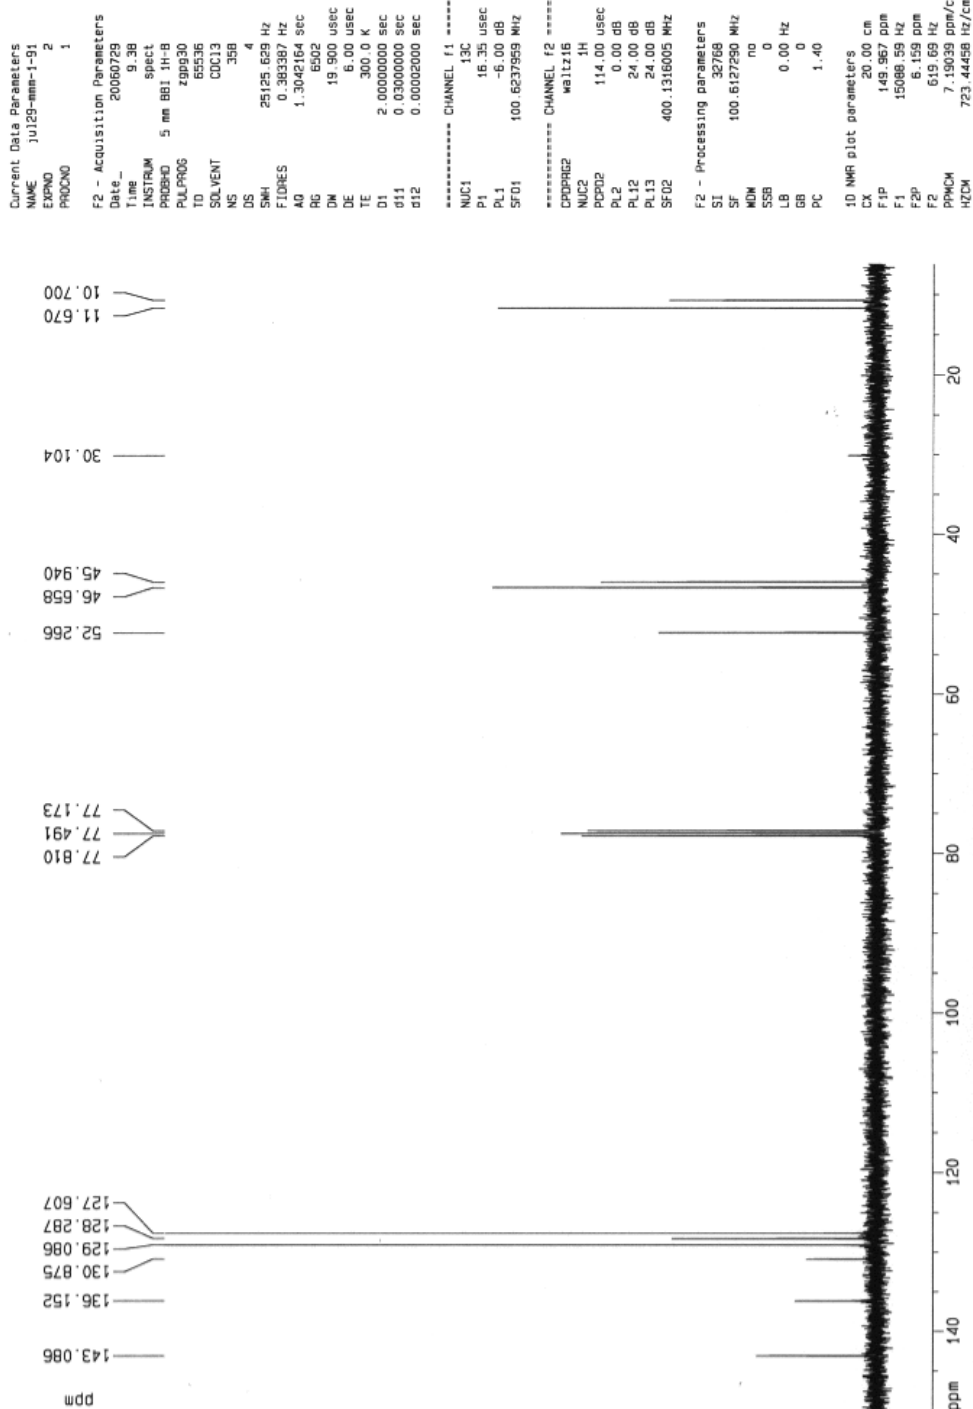

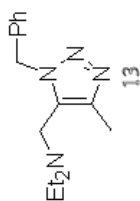

Current Data Parameters  
 NAME j0129-mm-1-91  
 EXPNO 1  
 PROCNO 1  
 F2 - Acquisition Parameters  
 Date\_ 20060729  
 Time 8.56  
 INSTRUM spect  
 PULPROG 5 mm BBT 1H-8  
 TO 2930  
 SOLVENT DMSO  
 NS 16  
 DS 2  
 SWH 8278.145 Hz  
 FIDRES 0.126314 Hz  
 AQ 3.9584243 sec  
 RG 35.9  
 DM 60.400 usec  
 DE 6.00 usec  
 TE 300.0 K  
 D1 1.00000000 sec  
 \*\*\*\*\* CHANNEL f1 \*\*\*\*\*  
 NUC1 1H  
 P1 6.45 usec  
 PL1 0.00 dB  
 SF01 400.1324710 MHz  
 F2 - Processing parameters  
 SI 32768  
 SF 400.1300000 MHz  
 WDW no  
 SSB 0  
 LB 0.00 Hz  
 GB 0  
 PC 1.00  
 ID NMR plot parameters  
 CX 20.00 cm  
 F1P 10.422 ppm  
 F1 4170.05 Hz  
 F2P 0.175 ppm  
 F2 69.97 Hz  
 PPMCM 0.51234 ppm/cm  
 HZCM 205.00388 Hz/cm

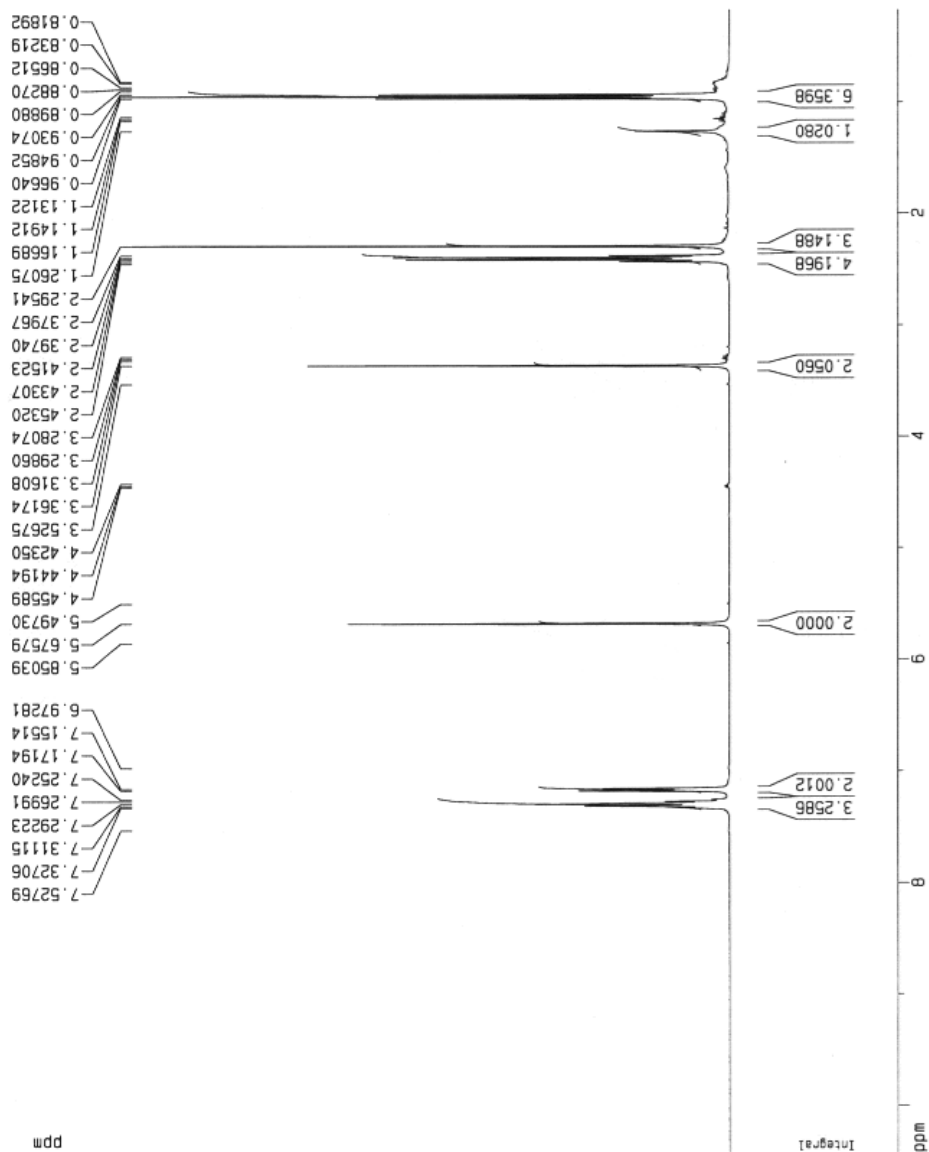

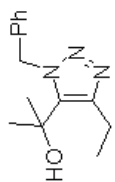

14

Current Data Parameters  
 NAME may17-mm-51  
 EXPNO 3  
 PROCNO 1

F2 - Acquisition Parameters  
 Date\_ 20060517  
 Time 17 09  
 INSTRUM spect  
 PROBHD 5 mm Multinu  
 PULPROG zgpg30  
 TO 65536  
 SOLVENT CDCl3  
 NS 52  
 DS 4  
 SWH 18832.393 Hz  
 FIDRES 0.267360 Hz  
 AQ 1.7400308 sec  
 RG 16384  
 DM 26.550 usec  
 DE 6.00 usec  
 TE 300.0 K  
 D1 2.00000000 sec  
 d11 0.03000000 sec  
 d12 0.00020000 sec

===== CHANNEL f1 =====  
 NUC1 13C  
 P1 11.80 usec  
 PL1 0.00 dB  
 SFO1 75.4750200 MHz

===== CHANNEL f2 =====  
 CPDPRG2 waltz16  
 NUC2 1H  
 P2 110.00 usec  
 PL2 0.00 dB  
 PL12 17.50 dB  
 PL13 17.50 dB  
 SFO2 300.1312005 MHz

F2 - Processing parameters  
 SI 32768  
 SF 75.4677190 MHz  
 WDW EM  
 SSB 0  
 LB 1.00 Hz  
 GB 0  
 PC 1.40

1D NMR plot parameters  
 CX 20.00 cm  
 F1P 159.155 ppm  
 F1 12011.05 Hz  
 F2P -4.915 ppm  
 F2 -370.96 Hz  
 PPMQW 8.20852 ppm/cm  
 HZQW 619.10077 Hz/cm

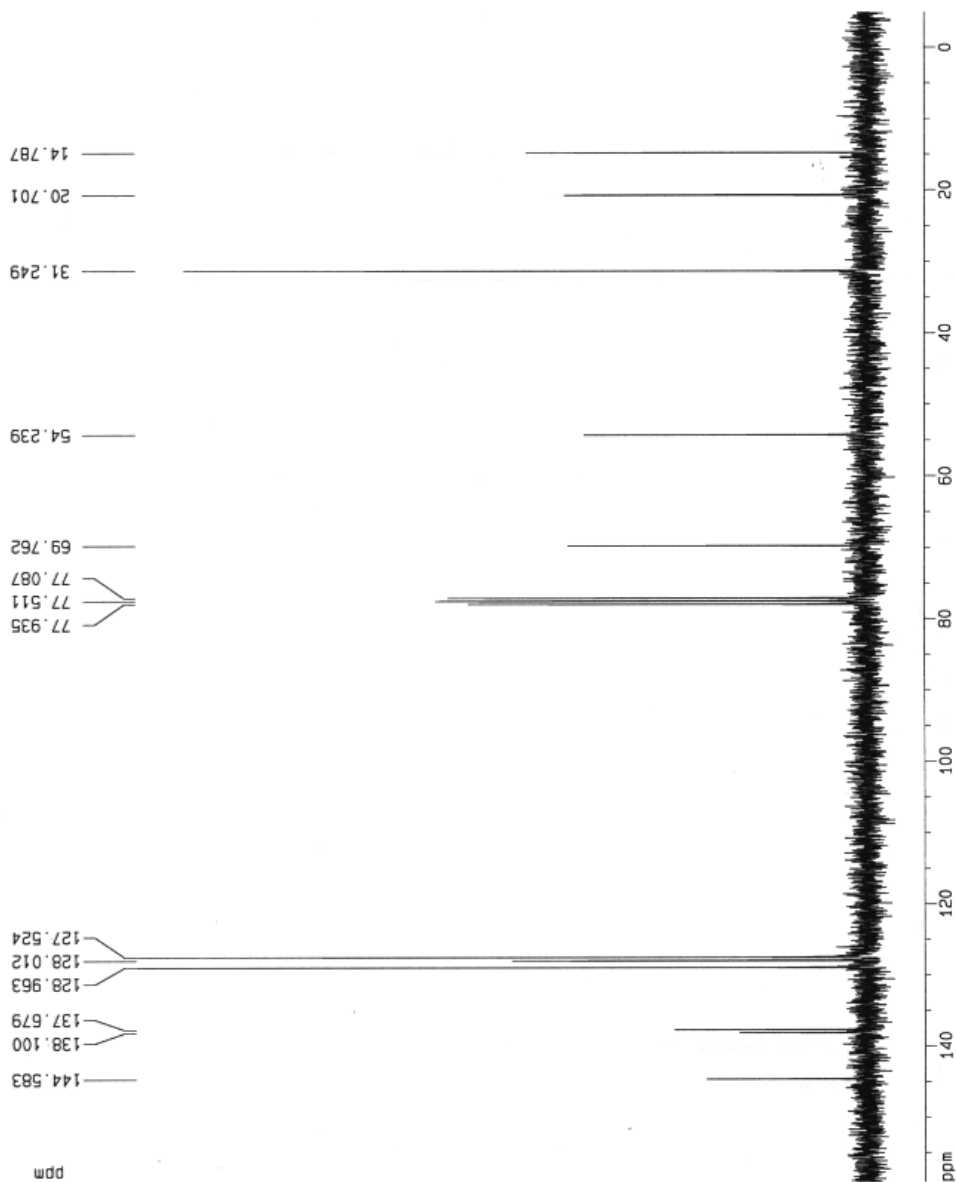

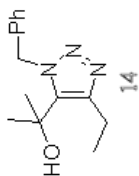

Current Data Parameters  
 NAME may17-mm-5f  
 EXPNO 2  
 PROCNO 1

F2 - Acquisition Parameters  
 Date\_ 20060517  
 Time 17.04  
 INSTRUM spect  
 PROBHD 5 mm Multinu  
 PULPROG zg30  
 TD 24690  
 SOLVENT CDCl3  
 NS 16  
 DS 2  
 SWH 6172.839 Hz  
 FIDRES 0.250014 Hz  
 AQ 1.9999400 sec  
 RG 128  
 DW 81.000 usec  
 DE 6.00 usec  
 TE 300.0 K  
 D1 1.00000000 sec

\*\*\*\*\* CHANNEL f1 \*\*\*\*\*  
 NUC1 1H  
 P1 9.60 usec  
 PL1 -6.00 dB  
 SF01 300.1316534 MHz

F2 - Processing parameters  
 SI 32768  
 SF 300.1300000 MHz  
 WDW no  
 SSB 0  
 LB 0.00 Hz  
 GB 0  
 PC 1.00

1D NMR plot parameters  
 CX 20.00 cm  
 FIP 8.060 ppm  
 F1 2418.96 Hz  
 F2P -0.019 ppm  
 F2 -5.82 Hz  
 PPMCM 0.40395 ppm/cm  
 HZCM 121.23901 Hz/cm

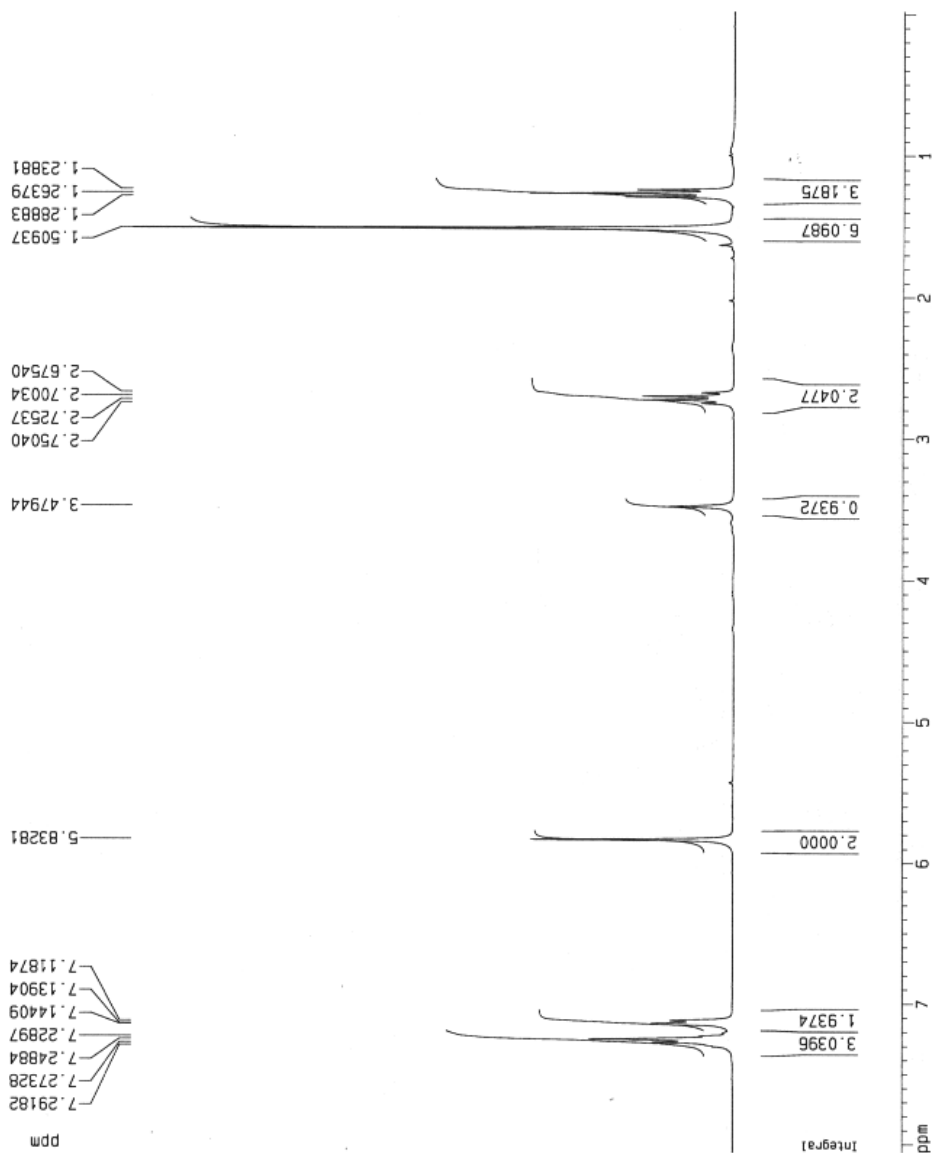

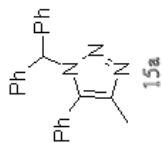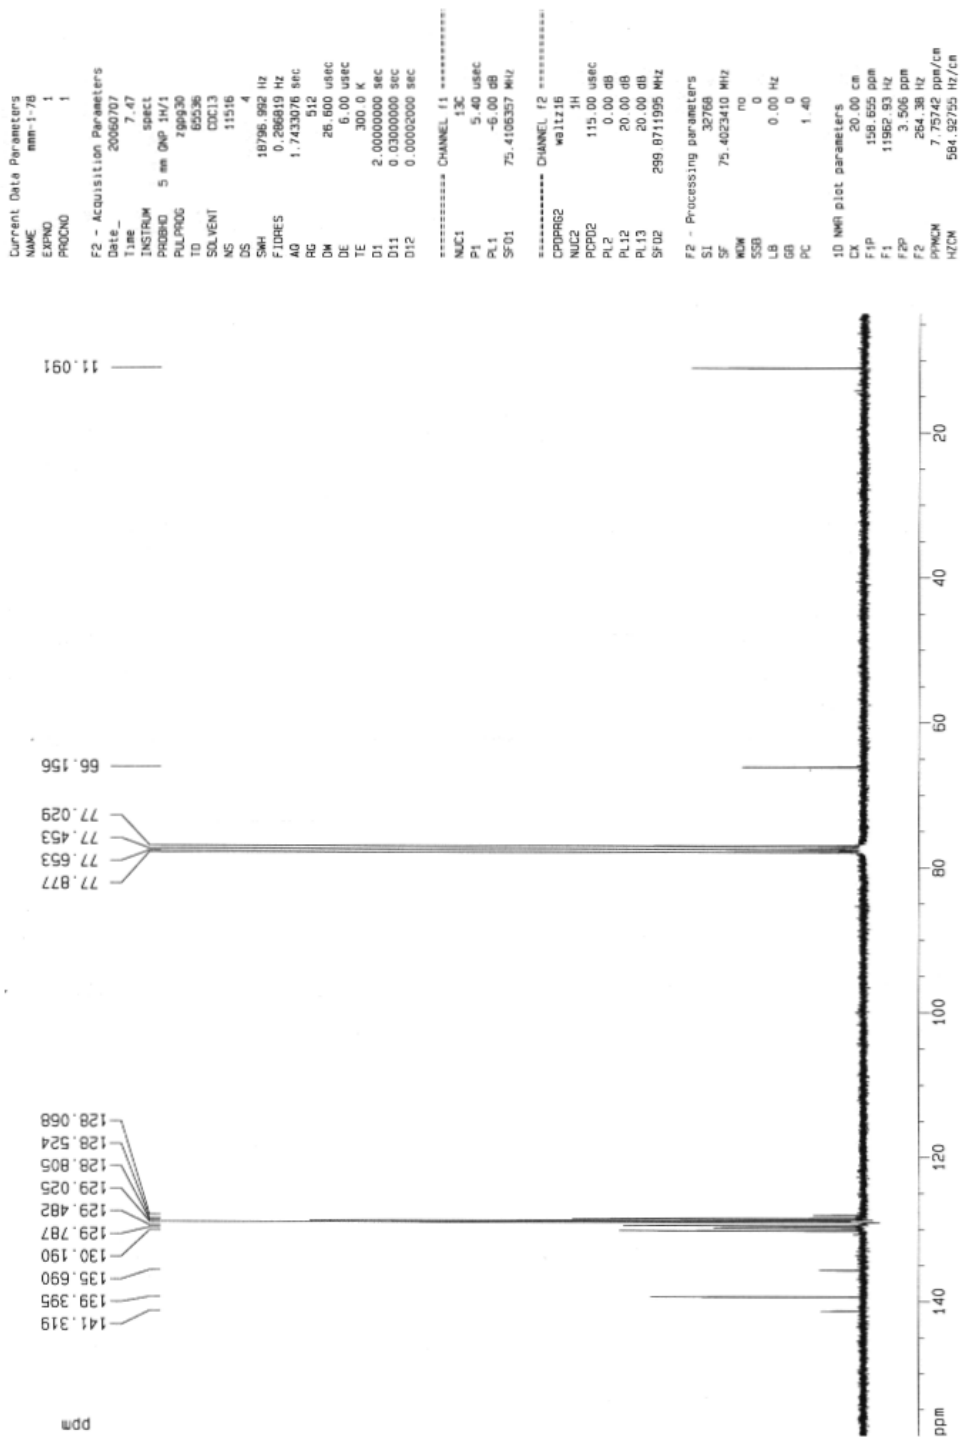

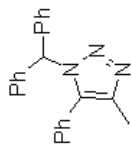

15a

# Current Data Parameters

NAME jul15-mm-1-7b  
EXPNO 1  
PROCNO 1

## F2 - Acquisition Parameters

Date\_ 20060705  
Time 17.24  
INSTRUM spect  
PROBHD 5 mm Multinu  
PULPROG zg30  
TD 24690  
SOLVENT CDCl3  
NS 16  
DS 2  
SWH 6172.839 Hz  
FIDRES 0.256014 Hz  
AQ 1.9999400 sec  
RG 512  
DM 81.000 usec  
DE 6.00 usec  
TE 300.0 K  
D1 1.00000000 sec

## ===== CHANNEL f1 =====

NUC1 1H

PL1 -6.00 dB  
SF01 300.1318534 MHz

## F2 - Processing parameters

SF 300.1300000 MHz  
SI 32768  
WDW no  
SSB 0  
LB 0.00 Hz  
GB 0  
PC 1.00

## 1D NMR plot parameters

CX 20.00 cm  
F1P 7.638 ppm  
F1 2292.53 Hz  
F2P 2.179 ppm  
F2 6553.87 Hz  
PPMCM 0.27289 ppm/cm  
HZCM 81.93328 Hz/cm

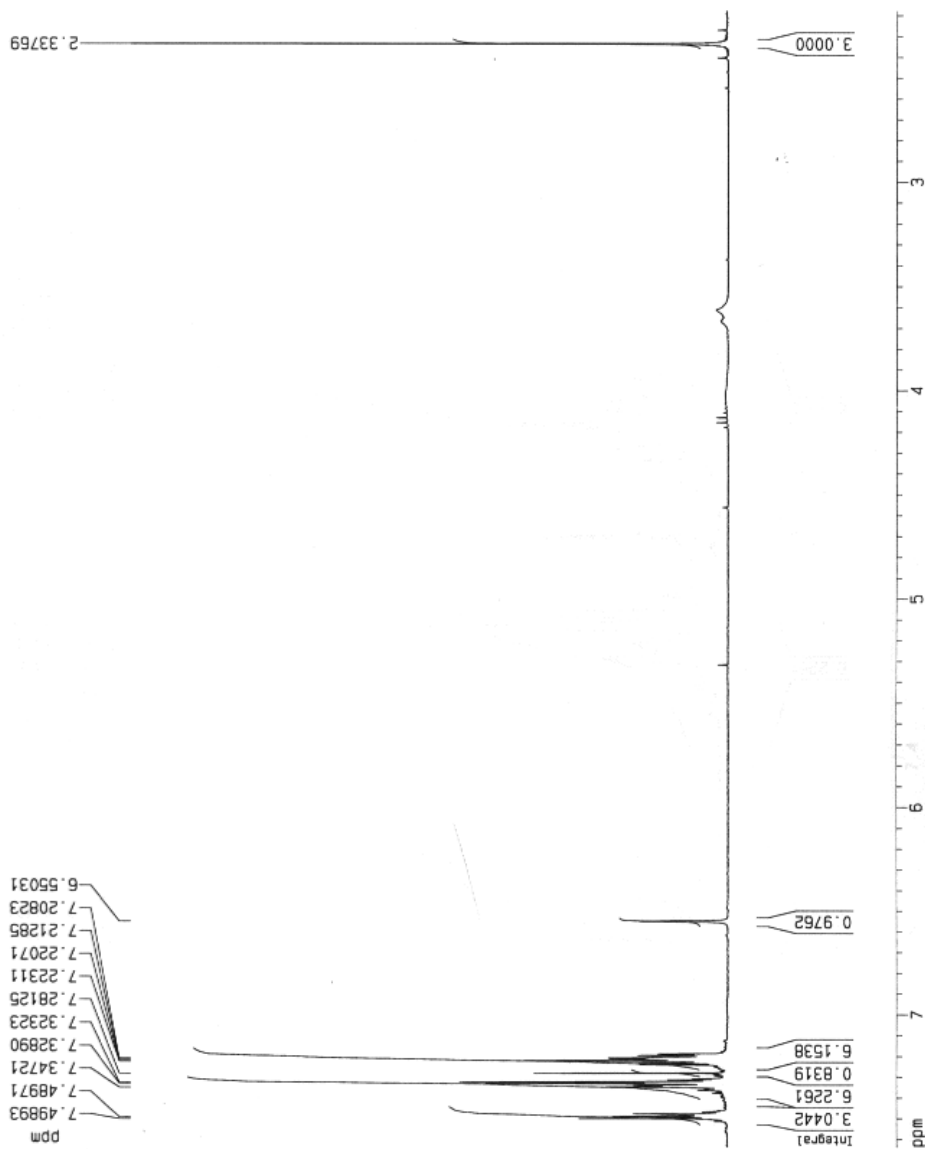

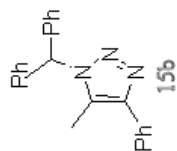

Current Data Parameters  
 NAME jun12-mm-1-66  
 EXPNO 7  
 PROCNO 1

F2 - Acquisition Parameters  
 Date\_ 20060613  
 Time 18.31  
 INSTRUM spect  
 PROBHD 5 mm BBI 1H-8  
 PULPROG zgpg30  
 TO 65536  
 SOLVENT CDCl3  
 NS 757  
 DS 4  
 SMH 25125.629 Hz  
 FIDRES 0.383387 Hz  
 AQ 1.3042164 sec  
 RG 4597.6  
 DW 19.900 usec  
 DE 6.00 usec  
 TE 300.0 K  
 D1 2.00000000 sec  
 d11 0.03000000 sec  
 d12 0.00020000 sec

===== CHANNEL f1 =====  
 NUC1 13C  
 P1 16.35 usec  
 PL1 -6.00 dB  
 SF01 100.6237959 MHz

===== CHANNEL f2 =====  
 CPDPRG2 waltz16  
 NUC2 1H  
 PCPD2 114.00 usec  
 PL2 0.00 dB  
 PL12 24.00 dB  
 PL13 24.00 dB  
 SF02 400.1315005 MHz

F2 - Processing parameters  
 SI 32768  
 SF 100.6127290 MHz  
 NQW EM  
 SSB 0  
 LB 1.00 Hz  
 GB 0  
 PC 1.40

1D NMR plot parameters  
 CX 20.00 cm  
 FIP 156.990 ppm  
 F1 15795.18 Hz  
 F2P 0.645 ppm  
 F2 64.88 Hz  
 PPMCM 7.81725 ppm/cm

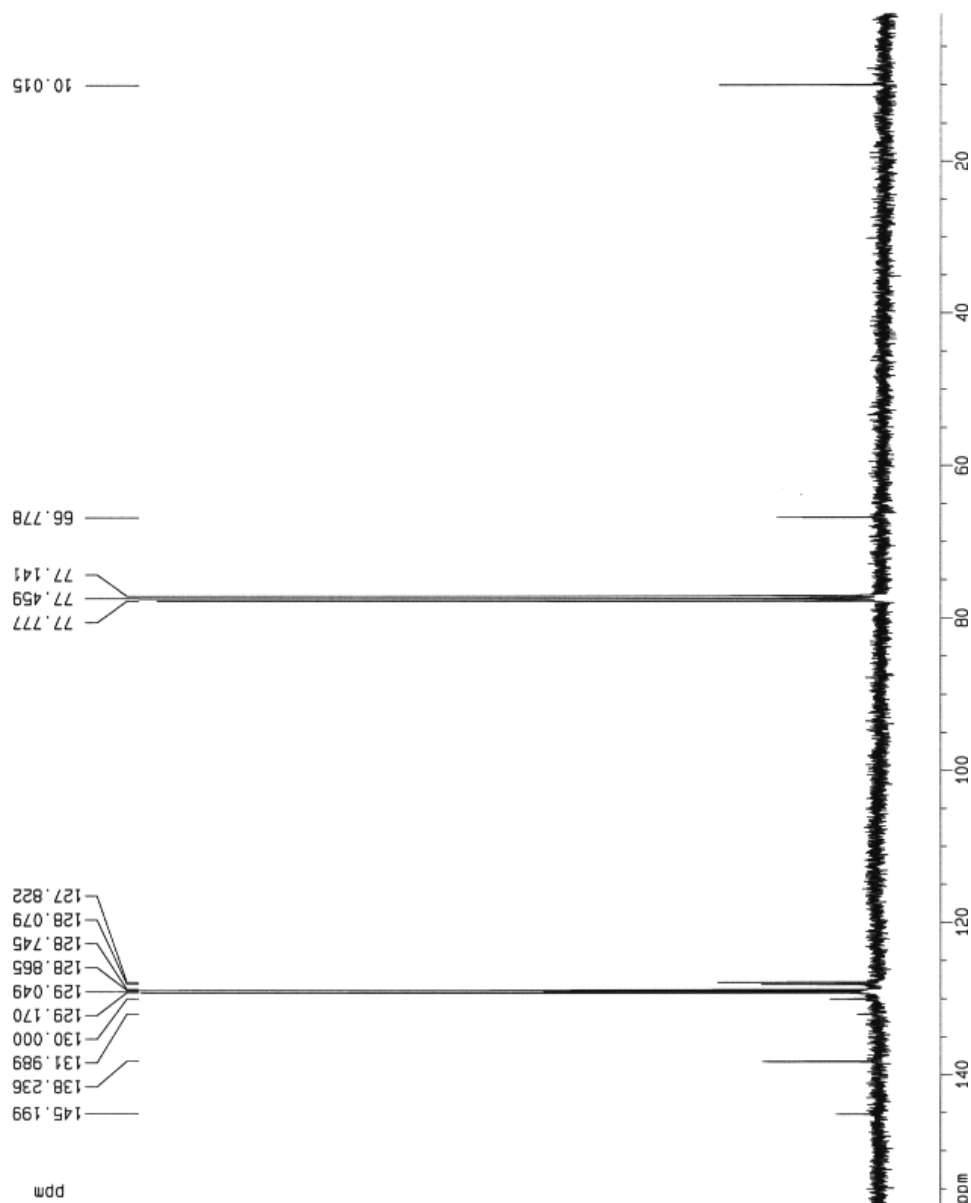



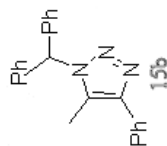

Current Data Parameters  
 NAME 1UN12-mm-1-B8  
 EXPNO 6  
 PROCNO 1

F2 - Acquisition Parameters  
 Date\_ 20060613  
 Time 18.05  
 INSTRUM spect  
 PROBHD 5 mm BBI 1H-B  
 PULPROG zg30  
 TO 33110  
 SOLVENT CDCl3  
 NS 16  
 DS 2  
 SMH 8278.146 Hz  
 FIDRES 0.250019 Hz  
 AQ 1.9998940 sec  
 RG 128  
 DM 60.400 usec  
 DE 6.00 usec  
 TE 300.0 K  
 D1 1.0000000 sec

\*\*\*\*\* CHANNEL f1 \*\*\*\*\*  
 NUC1 1H  
 P1 6.45 usec  
 PL1 0.00 dB  
 SF01 400.1324710 MHz

F2 - Processing parameters  
 SI 32768  
 SF 400.1300000 MHz  
 WDW na  
 SSB 0  
 LB 0.00 Hz  
 GB 0  
 PC 1.00

1D NMR plot parameters  
 CX 20.00 cm  
 FIP 8.455 ppm  
 F1 3382.94 Hz  
 F2P -0.132 ppm  
 F2 -52.65 Hz  
 PPMCM 0.42931 ppm/cm  
 HZCM 171.77953 Hz/cm

1.28654  
 0.99791  
 0.99314  
 0.97877  
 0.97260

2.07254

2.39841

3.62316

6.85224  
 7.25023  
 7.26530  
 7.27006  
 7.36173  
 7.37163  
 7.37657  
 7.38135  
 7.38672  
 7.39556  
 7.44515  
 7.46468  
 7.71967  
 7.73814

3.0721

1.0000

4.4456

7.0731

2.0977

2.0049

Integral

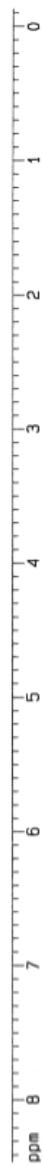

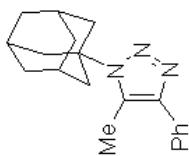

16

# Current Data Parameters

NAME mm-1-73  
EXPNO 1  
PROCNO 1

## F2 - Acquisition Parameters

Date\_ 20060907  
Time 7.40  
INSTRUM spect  
PROBHD 5 mm Multis  
PULPROG zgpg30  
TO 299930  
F2 65536  
SOLVENT CDCl3  
NS 11776  
DS 4  
SWH 18832.393 Hz  
FIDRES 0.267360 Hz  
AQ 1.7400306 sec  
RG 36384  
BW 26.550 usec  
DE 6.00 usec  
TE 300.0 K  
D1 2.00000000 sec  
d11 0.03000000 sec  
d12 0.00020000 sec

## ===== CHANNEL f1 =====

NUC1 13C  
P1 11.80 usec  
PL1 0.00 dB  
SFO1 75.4760200 MHz

## ===== CHANNEL f2 =====

CPDPRG2 waltz16  
NUC2 1H  
PCPD2 110.00 usec  
PL2 0.00 dB  
PL12 17.50 dB  
PL13 17.50 dB  
SFO2 300.1312005 MHz

## F2 - Processing parameters

SI 32768  
SF 75.4677190 MHz  
WDW no  
SSB 0  
LB 0.00 Hz  
GB 0  
PC 1.40

## 10 NMR plot parameters

CX 20.00 cm  
FJP 156.638 ppm  
F1 11972.05 Hz  
F2P -3.609 ppm  
F2 -272.33 Hz  
PPMCM 8.11233 ppm/cm  
HZCM 612.21912 Hz/cm

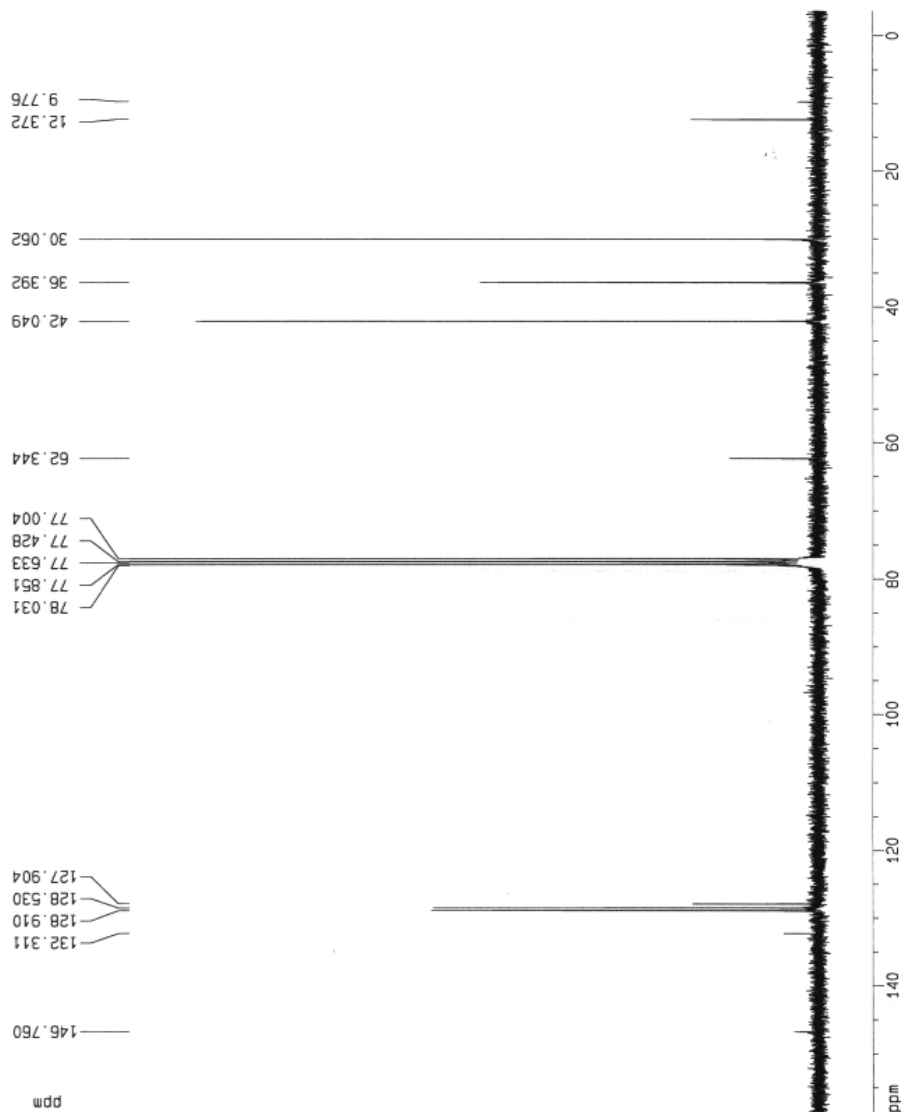

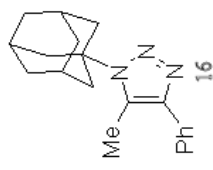

Current Data Parameters  
 NAME mm-1-73  
 EXPNO 1  
 PROCNO 1

F2 - Acquisition Parameters  
 Date\_ 20060905  
 Time 18.23  
 INSTRUM spect  
 PROBHD 5 mm BBI 1H-B  
 PULPROG zg  
 TO 65536  
 SOLVENT CDCl3  
 NS 1  
 DS 0  
 SWH 3881.988 Hz  
 FIDRES 0.059234 Hz  
 AQ 8.4410868 sec  
 RG 228.1  
 DM 128.800 usec  
 DE 6.00 usec  
 TE 300.0 K  
 D1 1.00000000 sec

----- CHANNEL f1 -----  
 NUC1 1H  
 P1 7.25 usec  
 PL1 0.00 dB  
 SFO1 400.1317335 MHz

F2 - Processing parameters  
 SI 32768  
 SF 400.1300000 MHz  
 WDW no  
 SSB 0  
 LB 0.00 Hz  
 GB 0  
 PC 1.00

10 NMR plot parameters  
 CX 20.00 cm  
 F1P 7.991 ppm  
 F1 3197.63 Hz  
 F2P 0.439 ppm  
 F2 175.83 Hz  
 PPMCM 0.37760 ppm/cm  
 HZCM 151.09000 Hz/cm

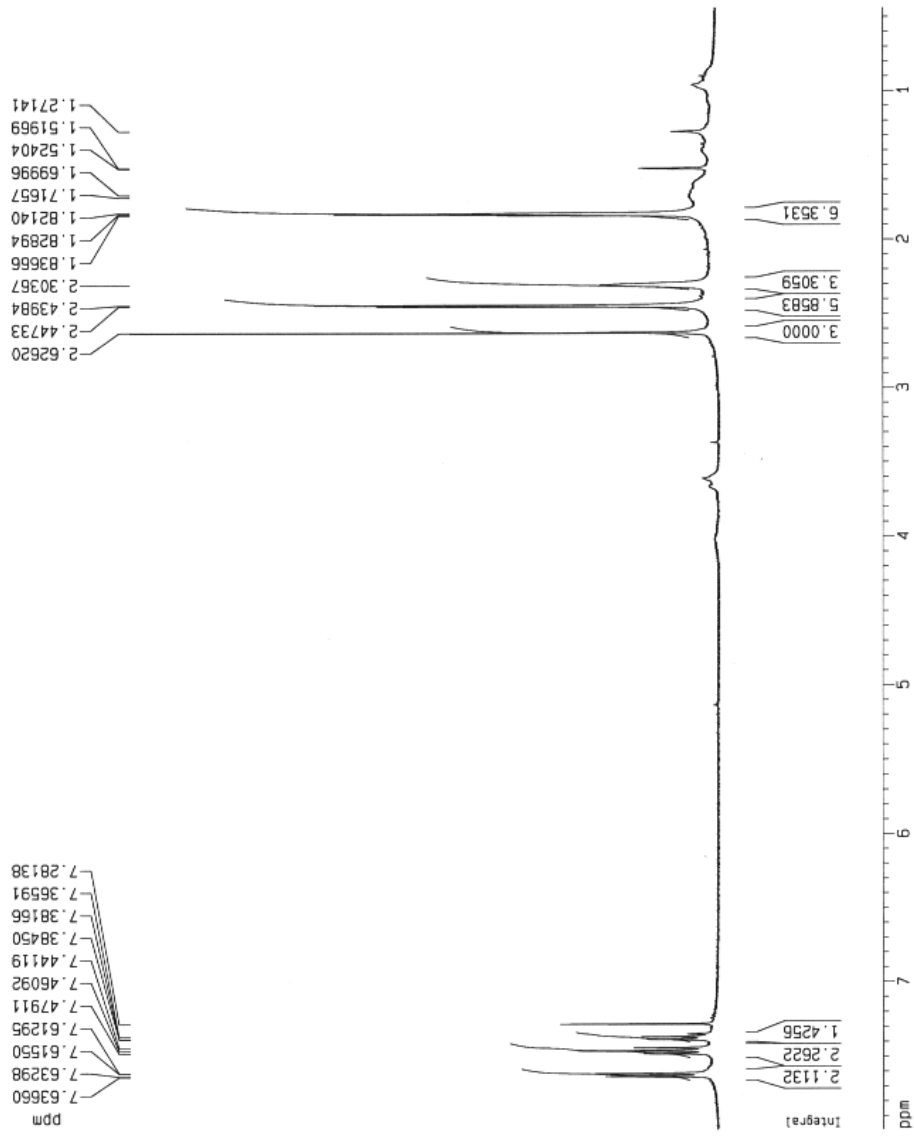

Supplement: Supplementary file 1 [file 4756987]
